1 **Living with high potassium: a balance between nutrient acquisition and stress signaling**  
2 **during K-induced salt stress**

3

4 Pramod Pantha<sup>1</sup>, Dong-Ha Oh<sup>1</sup>, David Longstreth<sup>1</sup> and Maheshi Dassanayake<sup>1,\*</sup>

5 <sup>1</sup>Department of Biological Sciences, Louisiana State University, Baton Rouge, LA 70803, USA

6

7 \*Author for correspondence: Email: [maheshid@lsu.edu](mailto:maheshid@lsu.edu)

8

9 **Summary**

- 10 • High potassium (K) in the growth medium is more toxic to plants than Na at similar  
11 concentrations. However, the molecular mechanisms underlying plant responses to K-  
12 induced salt stress are virtually unknown.
- 13 • We examined *Arabidopsis thaliana* and its extremophyte relative *Schrenkiella parvula*,  
14 using a comparative multi-omics approach to identify cellular processes affected by  
15 excess K and understand which deterministic regulatory pathways are active to avoid  
16 tissue damage while sustaining growth.
- 17 • *A. thaliana* showed limited capacity to curb excess K accumulation and prevent nutrient  
18 depletion contrasting to *S. parvula* which could limit excess K accumulation  
19 without restricting nutrient uptake. Facilitated by a targeted transcriptomic response,  
20 promoting nitrogen uptake along with other key nutrients and uninterrupted N  
21 assimilation into primary metabolites during excess K-stress allowed *S. parvula* to boost  
22 its antioxidant and osmolyte pools concurrently leading to sustained growth.  
23 Antithetically, *A. thaliana* showed transcriptional responses indicative of a poor balance  
24 between stress signaling, increased ROS levels, and reduced  
25 photosynthesis, subsequently leading to inhibited growth.
- 26 • The ability to regulate independent nutrient uptake and a coordinated transcriptomic  
27 response to avoid non-specific stress signaling are two main deterministic steps towards  
28 building stress resilience to excess K<sup>+</sup>-induced salt stress.

29

30 **Keywords**

31 abiotic stress, antagonistic pleiotropy, molecular phenotype, multi-omics, nutrient transport,  
32 osmoprotectants and antioxidants, potassium-induced salt stress, systems biology

33

34 **Introduction**

35 Can excess potassium ( $K^+$ ) in soil be too much of a good thing for plants? Its role as an  
36 essential macronutrient for plants is well established (Wang & Wu, 2013). The cytosolic  
37 concentration of  $K^+$  around 100 mM is typically higher than soil concentrations found in most  
38 agricultural soils (Maathuis, 2009). Past studies have focused  $K^+$  uptake into plants from low  
39 concentrations in the soil. Consequently, we barely understand excess  $K^+$ -induced salt stress in  
40 plants. While toxicity in plants exposed to high concentrations of nutrients such as boron (Wang  
41 *et al.*, 2021), copper (Lequeux *et al.*, 2010), and nitrogen (Yoshitake *et al.*, 2021), have been  
42 investigated, the molecular mechanisms behind  $K^+$  toxicity are virtually unknown.

43 Worldwide there are many soils naturally high in  $K^+$  (Duval *et al.*, 2005; Warren, 2016).  
44 Many industrial as well as agricultural processing plants produce wastewater with exceptionally  
45 high  $K^+$  concentrations considered excessive for plant growth (Arienzo *et al.*, 2009). During  
46 wastewater treatments, unlike N, P, or organic matter which are typically processed using  
47 microbial activity, K is concentrated due to evaporation. The need to use alternative agricultural  
48 lands and recycled wastewater for irrigation is a current necessity (IPCC, 2021). These needs  
49 cannot be addressed without foundational knowledge on how plant nutrient balance is  
50 achieved in the absence of prime agricultural land. Therefore, knowing the tolerance  
51 mechanisms against high K becomes an impending need in our quest to convert marginal lands  
52 into productive agricultural lands.

53 Past studies have reported that excess  $K^+$  severely affect growth of multiple crops and  
54 even halophytes (Eijk, 1939; Ashby & Beadle, 1957; Eshel, 1985; Matoh *et al.*, 1986; Wang *et al.*,  
55 2001; Ramos *et al.*, 2004; Richter *et al.*, 2019; Zhao *et al.*, 2020). These studies suggest that  $K^+$   
56 may not elicit the same physiological or metabolic stresses  $Na^+$  does and plants may require  
57 distinct genetic pathways in addition to canonical salt response pathways (Pantha &  
58 Dassanayake, 2020) to survive high K-induced salt stress.

59           In this study, we aimed to identify K-induced salt stress responses and deduce the  
60 underlying cellular mechanisms plants have evolved to adapt to K-toxicity. We compared  
61 *Arabidopsis thaliana*, sensitive to high K<sup>+</sup>, to its extremophyte relative, *Schrenkiella parvula* that  
62 thrives in high K<sup>+</sup> soils (Nilhan *et al.*, 2008; Oh *et al.*, 2014). We examined stress responses  
63 exhibited by the two model species to high K<sup>+</sup> treatments using a multi-omics approach to  
64 identify the relevant genetic pathways influential in regulating or are affected by K-toxicity. Our  
65 results revealed an extensive ionic, metabolic, and transcriptomic reprogramming during  
66 high potassium stress in the stress-sensitive model while providing novel insights into how the  
67 extremophyte model had evolved alternative metabolic and transcriptomic adjustments to  
68 enable growth under excess potassium.

69

## 70 **Materials and methods**

71           Detailed methods in Supporting Information Methods S1.

72           **Plant Material.** *Arabidopsis thaliana* (Col-0) and *Schrenkiella parvula* (Lake Tuz) were  
73 grown in controlled environments hydroponically, on plates, or in soil at 23°C, 12/12 h  
74 light/dark, and 60% relative humidity (Wang *et al.*, 2021). Multi-omics data were generated  
75 from plants grown in 1/5th Hoagland's solution which included 1.2 mM K<sup>+</sup> to support plant  
76 growth in all conditions. Supplemental KCl (150 mM) treatments provided excess K<sup>+</sup> beyond its  
77 expected range serving as a nutrient (0.1-6 mM) (Ashley *et al.*, 2006). Tissues were harvested at  
78 0, 3, 24, and 72 hours after treatment (HAT) for ionic, metabolomic, and transcriptomic  
79 profiling (Fig. S1).

80           **Physiological assessments.** Root growth assessments were made using plate-grown  
81 seedlings scanned and processed with ImageJ (Ferreira & Rasband, 2012). Reproductive stage  
82 assessments were taken from soil grown plants treated with 0-400 mM NaCl or KCl given for at  
83 least two weeks. CO<sub>2</sub> assimilation rates were measured on hydroponically grown plants using  
84 an infrared gas analyzer (LI-6400XT, LI-COR, Lincoln, USA).

85           **Elemental profiling.** Samples were processed following Ziegler *et al.* (2013) to quantify  
86 K, P, Mg, S, Ca, Al, Zn, Co, Ni, Fe, Se, Cu, B, Mn, Mo, As, Rb, Cd, Na, Li, and Sr via inductively  
87 coupled plasma mass spectrometry (Baxter *et al.*, 2014). Carbon and nitrogen were quantified

88 using a Costech 4010 elemental analyzer (Costech, Valencia, USA). Significant differences were  
89 calculated based on one-way ANOVA, followed by Tukey's post hoc test ( $p \leq 0.05$ ) using agricolae  
90 and visualized as heatmaps using pheatmap (R packages, v. 1.0.12) (Kolde, 2012).

91 **Metabolite profiling.** Non-targeted high throughput metabolite profiling was conducted  
92 on frozen samples using gas chromatography-mass spectrometry (Fiehn *et al.*, 2008).  
93 Significance tests were performed as described for ionomics and visualized using circlize, R (Gu  
94 *et al.*, 2014).

95 **RNA-seq analyses.** Total RNA was extracted from triplicates of root and shoot tissues  
96 harvested at 0, 3, 24, and 72 HAT with 150 mM KCl (Fig S1). Strand-specific RNA-seq libraries  
97 were sequenced on Illumina HiSeq4000. Reads uniquely mapped to *A. thaliana* TAIR10 or *S.*  
98 *parvula* (Dassanayake *et al.*, 2011) v2.2 gene models (<https://phytozome-next.jgi.doe.gov/>)  
99 (Table S2) were counted for identifying differentially expressed genes based on DESeq2 (Love *et*  
100 *al.*, 2014) at  $p\text{-adj} \leq 0.01$ . Orthologous gene pairs were identified using CLfinder-OrthNet (Oh &  
101 Dassanayake, 2019) and further refined as described in Wang *et al.* (2021). Median normalized  
102 expression of orthologs were used to determine temporal co-expression clusters based on fuzzy  
103 k-means clustering (Gasch & Eisen, 2002). Enriched functional groups were identified using  
104 BinGO (Maere *et al.*, 2005) ( $p\text{-adj} \leq 0.05$ ) and further summarized to non-redundant functional  
105 groups using GOMCL (Wang *et al.*, 2020).

106 **Histochemical analysis.** Leaves were stained for  $H_2O_2$  and  $O_2^-$  using 3,3'-  
107 diaminobenzidine and nitroblue tetrazolium (Jabs *et al.*, 1996; Daudi & O'Brien, 2012).

108

## 109 Results

### 110 KCl is more toxic than NaCl at the same osmotic strengths

111 Excess  $K^+$  exerted more severe growth disturbances than observed for  $Na^+$  at the same  
112 concentrations in both species (Figs 1, S2, S3). The extremophyte, *S. parvula*, was more resilient  
113 to higher concentrations of KCl than *A. thaliana* before it showed significant alterations to root,  
114 leaf, or silique development (Figs 1b-d, S2, S3).  $CO_2$  assimilation was reduced in *A. thaliana* in  
115 response to 150 mM KCl within 24 HAT, corresponding to a reduction in total shoot carbon (Fig.  
116 1e-f). Under long-term treatments, there was a greater reduction in total leaf area in both

117 species with high  $K^+$  than  $Na^+$  compared to control conditions (Figs 1d, S3b). These results  
118 suggest that despite similar levels of osmotic stress elicited by  $K^+$  and  $Na^+$  at equal  
119 concentrations,  $K^+$  may exert additional stresses different from  $Na^+$  that may initiate unique  
120 responses.

121 Overall, 150 mM KCl was sufficient to induce physiological stress responses in *A.*  
122 *thaliana* within a 3-day period, while impacting long-term growth in *S. parvula*. Notably, 150  
123 mM KCl treatments exceeding two weeks were lethal to *A. thaliana* in tested conditions.  
124 Therefore, we selected 150 mM KCl for our cross-species comparative-omics study to  
125 investigate  $K^+$  toxicity responses, when both species are expected to show active cellular  
126 responses during the early stages of the treatment at 0, 3, 24, and 72 HAT (Fig. S1).

### 127 **Excess $K^+$ causes nutrient depletion in *A. thaliana* but not in *S. parvula***

128 Plants have evolved multiple transporters to facilitate  $K^+$  entry into roots rather than its  
129 exit pathways (Shabala & Cuin, 2008). Therefore, we hypothesized that high  $K^+$  in soils will lead  
130 to high  $K^+$  contents in plants and shoots will accumulate more of the excess  $K^+$  in the transport  
131 sequence of soil-root-shoot. We predicted that the differential tissue compartmentalization of  
132  $K^+$  will alter K-dependent cellular processes. With elemental profiling of 18 nutrients and six  
133 common toxic elements (Methods S1, Fig. S1), we aimed to test if high  $K^+$  would, (a) accumulate  
134 as an isolated process; (b) cause nutrient imbalances; or (c) allow entry of other toxic elements  
135 and thereby indirectly cause toxicity symptoms.

136 Shoot  $K^+$  levels were higher than in roots, but this difference was strikingly larger in *S.*  
137 *parvula* than in *A. thaliana* under control conditions (Fig. 2a). When treated with excess  $K^+$ , *A.*  
138 *thaliana* initially reduced its root  $K^+$  levels, but was unable to restrict accumulation with  
139 prolonged stress, leading to significant increases by 72 HAT. Importantly, *S. parvula* maintained  
140 shoot  $K^+$  levels comparable to its control during  $K^+$  treatments (Fig. 2a).

141 Potassium accumulation in *A. thaliana* resulted in a severe nutrient imbalance leading to  
142 the depletion of seven nutrients including nitrogen (Fig. 2b-d). In line with uninterrupted root  
143 growth observed under 150 mM KCl (Fig. 1a-c), *S. parvula* showed a remarkable capacity in  
144 maintaining its macronutrients levels (Fig. 2d). Moreover, other elements did not accumulate  
145 under excess  $K^+$  to suggest indirect toxicity effects in either species (Fig. 2c). The overall ionic

146 profiles suggest that constraining K<sup>+</sup> accumulation while upholding other nutrient uptake  
147 processes is necessary for K<sup>+</sup> toxicity tolerance.

148 ***S. parvula* is more responsive than *A. thaliana* at the metabolome level to excess K<sup>+</sup> stress**

149 We obtained 472 (145 known and 327 unannotated) metabolite profiles across tissues  
150 and time points to identify metabolic processes influenced by K<sup>+</sup> stress (Table S1). The relative  
151 abundances of metabolites were highly correlated between the two species for similar  
152 conditions (Fig. 3a). For downstream analysis, we only considered the known metabolites with  
153 significant abundance changes (MACs) between control and KCl treated conditions (Fig. 3b).

154 We observed three distinct trends from metabolite profile comparisons (Fig. 3b-d). First,  
155 with longer stress durations, the number of MACs increased in both species. Second, *S. parvula*  
156 contained more MACs in roots, even though it had fewer physiological and ionic  
157 adjustments compared to *A. thaliana* under excess K<sup>+</sup> (Figs 1-2). *A. thaliana* shoots had more  
158 MACs than in *S. parvula* consistent with a reduction in photosynthesis seen in *A. thaliana* during  
159 K<sup>+</sup> toxicity (Fig. 1c). Third, more MACs in *S. parvula* increased in abundances contrasting to the  
160 depletion of those in *A. thaliana* (Fig. 3d). Amino acids were dominant among *S. parvula* MACs  
161 compared to sugars dominant among *A. thaliana* MACs (Fig. 3d). Our results suggest that the  
162 two species use two distinct primary metabolite groups to respond to excess K<sup>+</sup> in addition to  
163 contrasting shoot-root responses in line with having only a few MACs under shared responses  
164 between the species (Fig. 3b).

165 We predicted that *S. parvula* was enriched in MACs that minimized cellular stress, while  
166 MACs in *A. thaliana* were more representative of pathways disrupted by K<sup>+</sup> toxicity. Galactose  
167 metabolism was significantly enriched among MACs in *S. parvula* roots and *A. thaliana* shoots  
168 (Fig. S4a). Galactose metabolism includes several key metabolites (Fig S4b) known to protect  
169 plants against oxidative and osmotic stresses (Taji *et al.*, 2002; Nishizawa *et al.*, 2008).  
170 Interestingly, these increased uniquely in *S. parvula* roots (Fig. S4b). Antioxidants and  
171 osmoprotectants (galactinol, raffinose, myo-inositol, sucrose, and proline) (Taji *et al.*, 2002;  
172 Gong *et al.*, 2005; Nishizawa *et al.*, 2008) increased in *S. parvula* compared to *A. thaliana* (Figs  
173 3d, S4b). Collectively, the extremophyte, *S. parvula*, seemed to boost the protective  
174 metabolites minimizing damage from oxidative bursts in its roots, while the more stress

175 sensitive species, *A. thaliana*, was depleting its initial pools of such protective metabolites  
176 during stress.

### 177 ***A. thaliana* transcriptional responses are inept against K<sup>+</sup> toxicity**

178 We examined the transcriptional response landscapes to deduce distinct cellular  
179 processes initiated by *A. thaliana* and *S. parvula* upon excess K<sup>+</sup>. *S. parvula* showed lesser  
180 transcriptome-wide variation than *A. thaliana* based on a PCA of 23,281 ortholog pairs (Fig. 4a).  
181 Transcriptome similarities between tissues were consistent with high correlations between  
182 samples within a tissue/species (Fig. S5). The total number of differentially expressed genes  
183 (DEGs) was remarkably higher in *A. thaliana* (9,907 in roots and 12,574 in shoots) compared to  
184 those in *S. parvula* (1,377 in roots and 494 in shoots) (Fig. S6 and Table S3).

185 We annotated all DEGs with a representative Gene Ontology (GO) function (Table S4, S5,  
186 S6) and examined their time dependent progression in *A. thaliana* (Figs 4b and S6). The  
187 temporal transcriptomic response climaxed at 24 and 72 HAT in roots and shoots respectively  
188 (Fig. 4b). One of the primary emergent functions enriched in *A. thaliana* was response to stress  
189 (Fig. 4b). Within this category, the prevalent specific responses across all time points were  
190 responses to salt, oxidative, and ionic stresses. Biotic stress-related GO terms (e.g. response to  
191 bacterium, response to chitin, and immune response) were also prominently enriched at all  
192 time points (Fig. 4b) in *A. thaliana*, which seemed counterintuitive when *S. parvula* orthologs of  
193 those were mostly either unchanged or suppressed (Table S3 and S7). We examined if this was  
194 a sign of transcriptional misregulation at the peak response time inept to the extant stress  
195 experienced by *A. thaliana*.

196 We observed three indicators to suggest that there was broad misregulation in  
197 transcriptional responses upon excess K<sup>+</sup> accumulation in *A. thaliana*. First, transcriptional  
198 responses were enriched for all major plant hormone pathways in shoots beyond the expected  
199 enrichment associated with ABA, suggestive of wide-ranging disruptions to hormone signaling  
200 (Fig. 4b). Second, we found autophagy as the most enriched process among DEGs, accompanied  
201 by additional enriched processes including cell death and leaf senescence. Third, enriched  
202 responses to cold, heat, wounding, drought, and hypoxia suggestive of unmitigated oxidative  
203 stress were prevalent during 24-72 HAT (Fig. 4b). Therefore, we assessed the ROS accumulation

204 in *A. thaliana* and *S. parvula* leaves during high K<sup>+</sup> stress using oxidative stress markers, H<sub>2</sub>O<sub>2</sub>  
205 and O<sub>2</sub><sup>-</sup>. As predicted by the transcriptional response, leaves of *A. thaliana* showed severe  
206 oxidative stress compared to *S. parvula* (Fig. 4c). While fewer DEGs at 72 HAT compared to 24  
207 HAT implied a degree of stress acclimation in *A. thaliana* (Figs 4b and S6), the prolonged ABA  
208 signaling together with broad activation of hormone pathways, autophagy, and oxidative stress  
209 serve as transcriptional molecular phenotypes to indicate inept responses in *A. thaliana*. These  
210 molecular phenotypes become even more compelling when compared to their respective  
211 orthologous profiles in *S. parvula* which remained mostly unchanged (Fig. 4d).

212 Carboxylic acid/carbohydrate and amino acid metabolism formed the second largest  
213 group among the most affected processes following stress responses (Fig. 4b). These processes  
214 were enriched at all time points in *A. thaliana* roots and shoots consistent with the previous  
215 physiological and metabolic responses that showed primary C and N metabolism were severely  
216 affected (Figs 1e-f, 2d, 3c-d). Interruptions to photosynthesis at 24 and 72 HAT (Fig. 1e) were  
217 aligned with the corresponding transcriptional processes enriched at the same time points in *A.*  
218 *thaliana* shoots (Fig. 4b). Contrarily, root development was detected as a transcriptionally  
219 enriched process at 3 HAT (Fig. 4b), although the interruptions to root hair growth was  
220 detected at 72 HAT (Fig. 1c).

### 221 ***S. parvula* shows targeted transcriptomic responses steered toward stress tolerance**

222 We searched for DEGs among *A. thaliana* whose *S. parvula* orthologs also showed active  
223 responses (Fig. 5a). We posited that these orthologs represented cellular processes that require  
224 active transcriptional adjustments to survive the accumulation of excess K<sup>+</sup>. We further  
225 predicted that the diametric inter-species transcriptional responses (*i.e.* genes that are induced  
226 in one species when their orthologs are suppressed in the other species) will be deleterious to  
227 the stress sensitive species, while shared responses will be beneficial yet likely underdeveloped  
228 or unsustainable to survive prolonged stress in the stress sensitive species (Figs 5a, S6).

229 Response to stress was the largest functional group representative of diametric  
230 responses showing induction in *A. thaliana* compared to suppression in *S. parvula* (Fig. S6).  
231 Most of the subprocesses in this cluster were associated with biotic stress (Table S9). Therefore,  
232 we further assessed this transcriptional divergence between the two species as a proportional



233 effort invested in biotic vs abiotic stress out of total non-redundant DEGs within each species  
234 (Fig. 5b). The effort to suppress biotic stress in *S. parvula* roots (10%) was similar to the  
235 proportional induction for biotic stress in *A. thaliana* (9%) (Fig. 5b). Contrarily, orthologs that  
236 were suppressed in *A. thaliana*, but induced in *S. parvula* roots were associated with ion  
237 transport and cell wall organization (Fig. S6a). These transcriptional adjustments support the  
238 physiological response observed for *S. parvula* where uncompromised root growth was  
239 coincident to uninterrupted nutrient uptake during exposure to excess K<sup>+</sup> (Figs 1b, 2c). The  
240 orthologs suppressed in *A. thaliana* but induced in *S. parvula* shoots were enriched in carboxylic  
241 acid and amine metabolism and transport functions (Fig. S6b). Collectively, the antithetical  
242 transcriptomic, metabolic, ionomic, and physiological responses between the two species  
243 support the stress resilient growth of *S. parvula* distinct from *A. thaliana* (Figs 1-5).

244 The orthologs that showed shared inductions (156 in roots and 199 in shoots) were  
245 largely represented by abiotic stress responses (Fig. S6 and Table S10). The orthologs with  
246 shared suppression (149 in roots and 84 in shoots) were enriched in biotic stress responses in  
247 roots and photosynthesis in shoots. However, suppressed orthologs associated with biotic  
248 stress in *A. thaliana* (0.004%) were minimal based on a proportional effort compared to that in  
249 *S. parvula* (10%) (Fig. 5b).

250 Over 50% of orthologs differently expressed in response to excess K<sup>+</sup> in *S. parvula* roots  
251 and ~30% in shoots showed unique expression trends different from *A. thaliana* (Fig. 5a). We  
252 postulated that *S. parvula* activates decisive transcriptional regulatory circuits that are either  
253 absent (*i.e.* *S. parvula*-specific responses) or organized differently (*i.e.* diametric responses)  
254 than in *A. thaliana* when responding to excess K<sup>+</sup> stress.

255 The overall transcriptomic response of *S. parvula* encapsulates induction of more  
256 targeted salt stress responses than that of *A. thaliana*, including oxidative stress responses,  
257 sugar and amino acid metabolism, and associated ion transport, with concordant induction in  
258 growth promoting processes and transcriptional resource recuperation by suppressing biotic  
259 stress responses (Fig. 5c). The transcriptional effort to facilitate growth amidst excess K<sup>+</sup>  
260 accumulation in tissues is reflected by induced transcripts involved in cell wall biogenesis, RNA

261 processing, and development along with concurrent suppression for rapid growth limiting  
262 processes such as cell wall thickening and callose deposition (Table S10).

### 263 **Balance between differential expression of genes encoding K<sup>+</sup> transporters**

264 The ability in *S. parvula* to curb K<sup>+</sup> accumulation and prevent the depletion of major  
265 nutrients (Fig. 2) led us to hypothesize that genes encoding ion transporters are differentially  
266 expressed to prevent nutrient imbalance during excess K<sup>+</sup> stress. Moreover, ion transport was  
267 among the most represented functions within and between species transcriptome comparisons  
268 (Figs 4b, 5c, and S6a). We predicted that the genes coding for transporters which allow K<sup>+</sup> into  
269 roots and upload to the xylem or phloem would be primary targets for down-regulation in the  
270 effort to restrain K<sup>+</sup> accumulation, while inducing those that aid in vacuolar sequestration.

271 We first searched for genes that encoded K<sup>+</sup> transporters that showed significantly  
272 different basal level abundances (Fig. 6a) or/and responses to high K<sup>+</sup> (Fig. 6b). We categorized  
273 those into four transport routes: (a) limit entry into roots, (b) promote efflux from roots, (c)  
274 constrain long distance transport between root and shoot, and (d) enhance sequestration into  
275 vacuoles. We then assessed routes that were potentially weakened in *A. thaliana* and/or  
276 alternatively regulated in *S. parvula*.

277 **(a) Limit entry into roots.** The most suppressed gene (13-fold reduction) in *A. thaliana*  
278 under excess K<sup>+</sup> is the *high-affinity K<sup>+</sup> transporter 5 (HAK5)* (Gierth *et al.*, 2005), a major  
279 transporter for K<sup>+</sup> uptake during low K<sup>+</sup> availability (Fig. 6b). Under sufficient K<sup>+</sup> levels, the low  
280 affinity transporter, AKT1 with KC1 is activated (Gierth *et al.*, 2005; Wang *et al.*, 2016). HAK5  
281 and AKT1 are activated by the protein kinase complex, calcineurin B-like proteins 1 and 9  
282 (CBL1&9)/CBL-interacting protein kinase 23 (CIPK23) (Ragel *et al.*, 2015). Under excess K<sup>+</sup> stress  
283 both transporter complexes and their core regulatory unit in *A. thaliana* roots were suppressed  
284 (Figs 6b, c and S7a). Interestingly, the orthologous transporters in *S. parvula* roots were  
285 unchanged but the orthologs of the interacting kinase complex were suppressed (Figs 6b and  
286 S7a). The transcriptional effort to limit entry of K<sup>+</sup> into roots during K<sup>+</sup> stress is further  
287 exemplified by the suppression of *RAP2.11*, a transcriptional activator of *HAK5* (Kim *et al.*, 2012)  
288 and the induction of *ARF2*, a repressor of *HAK5* transcription (Zhao *et al.*, 2016), in *A. thaliana*  
289 roots (Fig 6c). Similarly, *ARF2* was induced in *S. parvula* roots. Other K<sup>+</sup> transporters associated

290 with K<sup>+</sup> uptake into roots were suppressed in *A. thaliana* (e.g. KUP6 and KUP8) under excess K<sup>+</sup>  
291 stress (Fig 6B). Alternatively, *S. parvula* roots showed a concerted transcriptional suppression of  
292 multiple genes encoding cyclic nucleotide gated channels, CNGC3/10/12/13 (Fig. 6b-c). This  
293 suggested limitations to non-selective uptake of K<sup>+</sup> into roots (Gobert *et al.*, 2006; Guo *et al.*,  
294 2008).

295 **(b) Promote efflux from roots.** K<sup>+</sup> efflux transporters to specifically extrude excess K<sup>+</sup>  
296 from roots to soil are unknown. However, *S. parvula*, which has evolved in soils naturally high in  
297 K<sup>+</sup>, induced transcription of a K<sup>+</sup> outward rectifying channel, *GORK* (Ivashikina *et al.*, 2001) and  
298 the Na<sup>+</sup> exporter *SOS1* (Shi *et al.*, 2000) in roots (Figs 6b, c and S8). Induction of *GORK* is known  
299 to cause K<sup>+</sup> leakage from roots under biotic and abiotic stresses in plants leading to  
300 programmed cell death (Demidchik *et al.*, 2014). We propose that *S. parvula* has evolved to  
301 allow export of excess K<sup>+</sup> via induction of *GORK* without the destructive downstream  
302 consequences of cell death as expected in *A. thaliana* (Figs 6b, c, 4b, and 4d). We also note that  
303 the basal expression of *GORK* in *S. parvula* roots is higher than in *A. thaliana* roots (Fig. 6a).  
304 *SOS1*, the antiporter with the highest Na<sup>+</sup> efflux capacity in roots, is known for its Na<sup>+</sup> specificity  
305 (Oh *et al.*, 2009). Therefore, induction of *SOS1* in *S. parvula* under high K<sup>+</sup> stress (Fig. S8) is likely  
306 an effort to counterbalance the increasing osmotic stress due to elevated K<sup>+</sup> by exporting  
307 available Na<sup>+</sup> from roots. This explanation fits with Na<sup>+</sup> being the only ion depleted in *S. parvula*  
308 roots during excess K<sup>+</sup> (Fig. 2c).

309 **(c) Constrain long distance transport between roots and shoots.** The long-distance  
310 transport of K<sup>+</sup> via xylem loading is mediated by *SKOR*, *NRT1.5*, and *KUP7* in *A. thaliana*  
311 (Gaymard *et al.*, 1998; Han *et al.*, 2016; Li *et al.*, 2017). *SKOR* and *NRT1.5* were suppressed in *A.*  
312 *thaliana* roots as predicted. However, *KUP7* showed induction in *A. thaliana* roots at 72 HAT  
313 concordantly when K<sup>+</sup> accumulation was observed in shoots (Figs 2a and 6b). Contrastingly,  
314 none of these transporters were differently regulated in *S. parvula* roots. *AKT2* is the dominant  
315 channel protein regulating long distance transport via loading and unloading to the phloem  
316 (Dreyer *et al.*, 2017). It too is significantly suppressed in *A. thaliana* shoots, but unchanged in *S.*  
317 *parvula* roots and shoots (Fig 6b-c).

318 **(d) Enhance sequestration into vacuoles.** Vacuolar [K<sup>+</sup>] is spatiotemporally regulated  
319 primarily by Na<sup>+</sup>,K<sup>+</sup>/H<sup>+</sup> antiporters, NHX1 and NHX2 and secondarily with higher selectivity for  
320 K<sup>+</sup> by NHX4 (Bassil *et al.*, 2019). The transcriptional signal to promote K<sup>+</sup> sequestration in *A.*  
321 *thaliana* roots or shoots is unclear with mixed regulation among *NHXs* compared to a more  
322 coordinated co-expression in *S. parvula* shoots (Fig. 6b-c). Furthermore, *A. thaliana* induced  
323 *KCO* genes encoding K<sup>+</sup>-selective vacuolar channel known to release K<sup>+</sup> from vacuoles to the  
324 cytosol (Voelker *et al.*, 2006) whereas, *S. parvula*, suppressed *KCO* orthologs implying K<sup>+</sup>  
325 sequestration (Fig. 6b-c). Such an attempt is further reinforced by the suppression of tonoplast  
326 localized nonselective cation channels *CNGC19* and *CNGC20* (Yuen & Christopher, 2013) in *S.*  
327 *parvula* roots.

328 Concordant to decreased photosynthesis, *A. thaliana* shoots represent a molecular  
329 phenotype suggestive of closed stomata via an induction of *GORK* together with a suppression  
330 of guard cell localized *KAT1/2* (Fig. 6b and c) (Ivashikina *et al.*, 2001; Szyroki *et al.*, 2001). Such a  
331 molecular phenotype is absent in *S. parvula*. Additionally, a sweeping array of differentially  
332 regulated aquaporins and calcium signaling genes were apparent in *A. thaliana* compared to  
333 limited orthologous responses in *S. parvula* (Fig. S7). This reinforces our overall depiction of the  
334 stress response in *S. parvula* to reflect a more restrained response during excess K<sup>+</sup>.

#### 335 **Excess K<sup>+</sup>-induced nitrogen starvation in *A. thaliana* avoided in *S. parvula***

336 The reduction in total nitrogen and amino acids in *A. thaliana* while those increased in *S.*  
337 *parvula* (Figs 2, 3); followed by suppression of amine metabolism-associated genes in *A.*  
338 *thaliana* when those were induced in *S. parvula* (Figs 4b, 5c, S6b) necessitated further  
339 examination on how excess K<sup>+</sup> may alter N-metabolism in plants. Under low [K<sup>+</sup><sub>soil</sub>], N uptake in  
340 the form of nitrate is tightly coupled to K uptake and translocation within the plant. Many of  
341 the K and N transporters or their immediate post-transcriptional activators are co-regulated at  
342 the transcriptional level (Coskun *et al.*, 2017). We searched for specific transcriptomic cues to  
343 determine how N transport was interrupted under high K<sup>+</sup>, leading to a deficiency in  
344 physiological processes needed to maintain growth or creating a shortage of protective  
345 metabolites against oxidative and osmotic stress.

346 The dual affinity nitrate transporter, NRT1.1 (NPF6.3/CHL1) is the main NO<sub>3</sub><sup>-</sup>  
347 sensor/transporter accounting for up to 80% of NO<sub>3</sub><sup>-</sup> uptake from roots (Feng *et al.*, 2020).  
348 Within 3 HAT and onwards, *NRT1.1* in *A. thaliana* roots is down-regulated (Fig. 7a). At low  
349 [NO<sub>3</sub><sup>-</sup><sub>soil</sub>], NRT1.1 is activated by CIPK23 to function as a high affinity NO<sub>3</sub><sup>-</sup> transporter (Coskun  
350 *et al.*, 2017). In *A. thaliana* (and not in *S. parvula*) roots, *CIPK23* is concurrently suppressed with  
351 the main K<sup>+</sup>-uptake system formed of *HAK5* and *AKT1-KC1* (Fig. 6c). This potentially limits the N  
352 content in roots within 24 HAT (Fig. 2b). Correspondingly, *A. thaliana* roots activated N  
353 starvation signals by inducing the expression of genes encoding high affinity NO<sub>3</sub><sup>-</sup> transporters,  
354 NRT2.1 and NRT2.4 (O'Brien *et al.*, 2016) despite sufficient N in the growth medium (Fig. 7A).  
355 Therefore, *A. thaliana* showed a molecular phenotype of K<sup>+</sup>-induced N-starvation.

356 The long-distance transport from root to shoot via xylem loading of NO<sub>3</sub><sup>-</sup> in roots is  
357 primarily regulated via NRT1.5 (NPF7.3) which is a NO<sub>3</sub><sup>-</sup>/K<sup>+</sup> cotransporter (Li *et al.*, 2017). In *A.*  
358 *thaliana* (and not in *S. parvula*) roots, *NRT1.5* was suppressed possibly in an attempt to limit  
359 excess K<sup>+</sup> accumulation in shoots, but consequently depriving NO<sub>3</sub><sup>-</sup> in shoots (Figs 2b and 7a).  
360 High K<sup>+</sup>-induced N-starvation in *A. thaliana* was further reflected by its additional  
361 transcriptional effort to remobilize NO<sub>3</sub><sup>-</sup> internally. For example, *NRT1.7* and *NRT1.8* were  
362 induced to promote translocation of NO<sub>3</sub><sup>-</sup> from old to young leaves and from xylem back into  
363 roots respectively, while *NRT1.9*, *NRT1.11*, and *NRT1.12* were suppressed to restrict transport  
364 via phloem in shoots (Fig. 7a) (O'Brien *et al.*, 2016). The transcriptional regulatory emphasis on  
365 *NRT1.8* is outstanding during excess K<sup>+</sup>, given that it is the highest induced gene (104-fold and  
366 73-fold at 24 and 72 HAT, respectively) in the entire *A. thaliana* transcriptomic response (Fig. 7a  
367 and Table S3). Interestingly, *NRT1.8* is triplicated in *S. parvula* (Oh & Dassanayake, 2019),  
368 possibly allowing additional regulatory flexibility to redistribute NO<sub>3</sub><sup>-</sup> via the xylem back to the  
369 roots.

370 NH<sub>4</sub><sup>+</sup> provides another N source and the growth medium included 0.2 mM NH<sub>4</sub><sup>+</sup>  
371 compared to 1.4 mM NO<sub>3</sub><sup>-</sup>. Therefore, we expected to see transcriptional induction of NH<sub>4</sub><sup>+</sup>  
372 transporters to compensate for excess K<sup>+</sup>-induced N-starvation in *A. thaliana* roots. NH<sub>4</sub><sup>+</sup> and K<sup>+</sup>  
373 transport are known to be antagonistically regulated (Coskun *et al.*, 2017). The high affinity  
374 NH<sub>4</sub><sup>+</sup> transporters (AMTs) are inhibited by CIPK23 (Straub *et al.*, 2017). Counterintuitive to our

375 expectations, *AMT1;1/2/3*, which account for >90% of ammonium uptake into roots (Yuan *et*  
376 *al.*, 2007), were co-suppressed in *A. thaliana* (Fig 7A).

377 We next checked whether the N assimilation pathway from  $\text{NO}_3^-$  to glutamine via  $\text{NH}_4^+$   
378 was also suppressed in *A. thaliana*. Indeed, the genes encoding nitrate reductase (*NIA1/NR1*,  
379 *NIA2/NR2*) and nitrite reductase (*NIR*) were coordinately down-regulated in *A. thaliana* under  
380 high  $\text{K}^+$  (Fig. 7b). In angiosperms, the main assimilation point of inorganic N to organic  
381 compounds is the GS-GOGAT (glutamine synthetase-glutamate synthase) pathway which is  
382 tightly coupled to the N and C metabolic state of the plant (O'Brien *et al.*, 2016). The cytosolic  
383 *GLN1;2* and plastidial *GLN2* (coding GS enzymes) together with *GLT* and *GLU1* (coding GOGAT  
384 enzymes) were suppressed (Figs 2d and 7b). Contrastingly, the induction of *GLN1;1* and *GLN1;3*  
385 together with *GLU2* especially in *A. thaliana* shoots may reflect an effort to recycle N under N-  
386 starved conditions (Fig. 7b).

387 We predicted that the suppression of the N-assimilation pathway would be reflected in  
388 the change in primary metabolites derived from glutamate in *A. thaliana*. We checked if *A.*  
389 *thaliana* had weakened resources to mount appropriate defenses against osmotic and oxidative  
390 stress coincident to the depletion of metabolites directly derived from glutamate that are  
391 osmolytes and antioxidants (Fig. 7c). Both species showed a coordinated effort to accumulate  
392 proline and its immediate precursors via induction of key proline biosynthesis genes (Fig. 7b,  
393 *P5CS1/2*, *P5CR*). However only *S. parvula* was able to significantly accumulate proline during  
394 exposure to excess  $\text{K}^+$  (Fig. 7c). Proline has dual functions as an osmoprotectant and an  
395 antioxidant (Hayat *et al.*, 2012). We see similar pronounced efforts in increasing antioxidant  
396 capacity via GABA and beta-alanine (Fig. 7b, c), concordant to increased synthesis of raffinose  
397 and myo-inositol against osmotic stress in *S. parvula* (Fig. S4b). Overall, *S. parvula* is able to  
398 accumulate carbon and nitrogen-rich antioxidants and osmoprotectants by maintaining N  
399 uptake from roots and N-assimilation pathways independently from the suppressed K-uptake  
400 pathways. Contrastingly, the two processes were jointly suppressed in *A. thaliana* leading to the  
401 depleted N resources (Fig. 2b) and, in turn, failure to accumulate C and N-rich protective  
402 metabolites (Fig. 7c).

403 **Co-expressed gene clusters indicate stress preparedness in *S. parvula***

404 We generated co-expressed clusters using 14,318 root and 14,903 shoot ortholog pairs  
405 of which, we identified five root and three shoot clusters (Fig. 8, RC1-5 and SC1-3, respectively)  
406 (Fig. 8. and Table S11). In three root co-expressed clusters, *A. thaliana* orthologs showed a  
407 maximum response at 24 HAT, while *S. parvula* showed constitutive responses (Fig. 8a, RC1-3).  
408 These clusters largely represented transcripts associated with stress responses, C and N  
409 metabolism, transport, and root development we discussed earlier (Fig. 4). The 4th and 5th  
410 clusters (Fig. 8a, RC4-5, 203 ortholog pairs), where *S. parvula* showed a response, comprised  
411 functionally uncharacterized genes (37%) that could not be summarized into representative  
412 processes. This highlights the extent of functional obscurity or novelty of genes that respond to  
413 specific ionic stresses minimally characterized in *A. thaliana* (Fig. 8a, RC5), and the novel  
414 regulatory modes detected in orthologs of closely related species whose functional assignment  
415 may have been overlooked due to the lack of responses in *A. thaliana* (Fig. 8a, RC4). In all three  
416 co-expressed shoot clusters, *A. thaliana* again showed a peak response at 24 HAT, while *S.*  
417 *parvula* orthologs showed constitutive expression (Fig. 8b). The enriched functions in shoot  
418 clusters largely overlapped to include stress responses and C and N metabolic processes.

419 *S. parvula* showed constitutive expression in all clusters (9,633 orthologs) except in RC4  
420 and RC5, while *A. thaliana* showed constitutive expression only in RC4 (76 orthologs) (Fig. 8).  
421 Overall, these co-expressed clusters between *A. thaliana* and *S. parvula* demonstrate the  
422 transcriptome-level stress preparedness in *S. parvula* to facilitate growth and development  
423 during excess K<sup>+</sup> stress.

424

## 425 Discussion

426 Salt tolerance mechanisms against high K<sup>+</sup> are largely unknown compared to the  
427 collective understanding for high Na<sup>+</sup> tolerance in plants. Our results demonstrate that high K<sup>+</sup>  
428 is more deleterious than Na<sup>+</sup> given at the same external concentrations (Fig. 1). Previous studies  
429 support this observation noting that excess KCl caused more severe stress symptoms (Eijk,  
430 1939; Ashby & Beadle, 1957; Eshel, 1985; Match *et al.*, 1986; Cramer *et al.*, 1990; Wang *et al.*,  
431 2001; Ramos *et al.*, 2004; Richter *et al.*, 2019; Zhao *et al.*, 2020). The canonical adaptations

432 described for salt tolerance mechanisms associated with NaCl-induced salt stress (Pantha &  
433 Dassanayake, 2020) are insufficient to explain adaptations required for KCl-induced salt stress.

434 The extremophyte, *S. parvula*, amidst high K<sup>+</sup> can sustain its growth and development;  
435 compartmentalize excess K in roots than in shoots; maintain uninterrupted nutrient uptake;  
436 increase its antioxidants and osmoprotectants; decouple transcriptional regulation between K  
437 and N transport; and coordinately induce abiotic stress response pathways along with growth  
438 promoting pathways (Fig. 9). Contrastingly, the more stress-sensitive plant, *A. thaliana* shows,  
439 interrupted growth; excessive accumulation of K<sup>+</sup> in roots and shoots; depletion of essential  
440 nutrients; depletion of N-containing metabolites; and sweeping transcriptomic adjustments  
441 suggesting initiation of autophagy, ROS accumulation, induction of both abiotic and biotic  
442 stresses, and responses to all major hormone pathways (Fig. 9). Based on our comparative  
443 analyses, we propose two deterministic steps in the overall stress response sequence to survive  
444 high K<sup>+</sup> stress.

#### 445 **Surviving K toxicity by avoiding N starvation**

446 K is a macronutrient and plants have evolved many functionally redundant transporters  
447 to uptake K<sup>+</sup> into roots and redistribute within plants (Shabala & Cuin, 2008). When external  
448 [K<sup>+</sup>] exceed physiologically optimal conditions, it is not surprising that the immediate response  
449 from both plants was to suppress expression of K<sup>+</sup> transporters that primarily control K<sup>+</sup> influx  
450 at the root-soil interface (Fig. 6). Additionally, *S. parvula* down-regulated non-selective CNGCs  
451 that may be permeable to K<sup>+</sup> in roots. Several CNGCs are reported to allow Na<sup>+</sup> or K<sup>+</sup> transport  
452 and have been implicated in their functions during Na-induced salt stress by controlling Na  
453 influx into roots. However, their functional and spatiotemporal specificity remains largely  
454 unresolved (Dietrich *et al.*, 2020) and needs to be determined before evaluating how selected  
455 CNGCs may be involved in limiting excess K influx under K-induced salt stress.

456 *A. thaliana* further seems to suppress long distance transport of K<sup>+</sup> via NRT1.5 that co-  
457 transports NO<sub>3</sub><sup>-</sup> and K<sup>+</sup> (Li *et al.*, 2017). NO<sub>3</sub><sup>-</sup> is transported as a counterion with K<sup>+</sup> in root to  
458 shoot translocation as described by the 'Dijkshoorn–Ben Zioni model' (Dijkshoorn *et al.*, 1968;  
459 Zioni *et al.*, 1971; Coskun *et al.*, 2017). The suppression of NRT1.5 limits NO<sub>3</sub><sup>-</sup> remobilization in  
460 plants (Chen *et al.*, 2012). This interference to N transport within the plant is compounded by



461 the transcriptional co-suppression of NRT and AMT transporters known to limit N intake from  
462 soil (Fig. 7) (Tegeer & Masclaux-Daubresse, 2018). This creates an N-starved condition for *A.*  
463 *thaliana* not observed for *S. parvula*. During limiting K<sup>+</sup> conditions, N-uptake is down regulated  
464 to prevent excess N-induced toxicity in plants as a favorable mechanism to adapt to K<sup>+</sup>-  
465 starvation (Armengaud *et al.*, 2004). This interdependent N and K transport and regulation  
466 favorable at low [K<sup>+</sup><sub>soil</sub>] appear to be detrimental at high [K<sup>+</sup>] as it creates an antagonistic  
467 pleiotropic effect (condition dependent traits that can cause positive as well as negative  
468 impacts).

469 We observed a significant induction of *NRT1.8/NPF7.2* suggestive of an effort to  
470 reimport N from the stele in *A. thaliana* (Li *et al.*, 2010). However, this transcriptional effort did  
471 not cascade to the ionic level (Fig. 2b and d). N remobilization via induction of *NRT1.8* while  
472 concurrently suppressing *NRT1.5* (Fig. 7a) during N starvation is regulated by ethylene-jasmonic  
473 acid signaling together with low N-sensing by nitrate reductase (Chen *et al.*, 2012) (Zhang *et al.*,  
474 2014). Both ethylene and jasmonic acid signaling are among the enriched differently regulated  
475 transcriptional processes in *A. thaliana* (Fig. 4b). Interestingly, *S. parvula* appears to have a  
476 more flexible and effective regulatory capacity to allow N-uptake decoupled from restricted K-  
477 uptake and it does not suppress internal remobilization of NO<sub>3</sub><sup>-</sup> and K<sup>+</sup> via *NRT1.5* (Figs 6 and 7).  
478 This may prevent *S. parvula* from experiencing a high-K induced N-starvation.

479 The depletion of N uptake in *A. thaliana* further cascades into depletion of primary  
480 metabolites containing N (Fig. 3d) with a concomitant transcriptional suppression observed in N  
481 assimilation via the GS-GOGAT pathway (Fig. 7) (O'Brien *et al.*, 2016; Ji *et al.*, 2019). This not  
482 only creates a shortage of essential primary metabolites required for growth and development,  
483 but also depletes essential antioxidants and osmolytes to defend against the mounting  
484 oxidative and osmotic stresses (Figs 3, 4b-d, 7, 9). High K in the growth medium is known to  
485 exert osmotic and oxidative stress (Osakabe *et al.*, 2013; Zheng *et al.*, 2013). This creates an  
486 overall need to boost osmotic and antioxidant defense systems to successfully survive high K<sup>+</sup>  
487 toxicity.

488 Synergistic transcriptional and metabolic resource allocation to increase  
489 osmoprotectants during high K<sup>+</sup> is much more pronounced in *S. parvula* than in *A. thaliana* (Figs

490 3, 7). Proline accumulation resulting from increased synthesis and reduced catabolism have  
491 been widely shown as a key adaptation during salt stress (Kishor *et al.*, 1995; Gong *et al.*, 2005;  
492 Kant *et al.*, 2006; Kumar *et al.*, 2010; Hayat *et al.*, 2012).

493 K and N regulate phosphorus uptake (Coskun *et al.*, 2017; Maeda *et al.*, 2018; Cui *et al.*,  
494 2019), while K<sup>+</sup> toxicity can induce P-starvation (Ródenas *et al.*, 2019). *A. thaliana* experienced  
495 severe shortages of multiple key nutrient depletions (Fig. 2), which *S. parvula* seemingly  
496 avoided by having independent regulatory capacity of K and N uptake (Figs 6, 7, and 9).  
497 Therefore, we propose that the ability to regulate independent K<sup>+</sup> uptake is the first key  
498 deterministic step towards building resilience to excess K<sup>+</sup>.

#### 499 **Avoiding transcriptional misregulation of K<sup>+</sup> signaling**

500 Multiple hormonal pathways use K<sup>+</sup> for developmental, biotic stress, and abiotic stress  
501 signaling (Zhang *et al.*, 2014; Hauser *et al.*, 2017; Shabala, 2017). Canonical mechanisms  
502 involving K<sup>+</sup> signaling for growth are based on sensing external K<sup>+</sup> at low or favorable  
503 conditions. When supplied with toxic levels of K<sup>+</sup>, *A. thaliana* induced non-selective hormone  
504 signaling pathways inept to the extant stress (Fig. 4) indicative of transcriptional misregulation.  
505 Therefore, we propose that the capacity to avoid transcriptional misregulation of K<sup>+</sup> signaling is  
506 the second major deterministic step in surviving high K<sup>+</sup> stress. If unavoided, it can lead to  
507 systemic damage via activation of ROS and autophagy pathways, as demonstrated by *A.*  
508 *thaliana* with its increased ROS accumulation perhaps resulting from induction of futile biotic  
509 stress responses or unmitigated oxidative stresses induced by high K<sup>+</sup> detrimental especially at  
510 a nutrient starved environment (Fig. 4). ROS accumulation combined with autophagy are  
511 associated with abiotic and biotic stress responses, and developmental processes (Liu *et al.*,  
512 2005; Thompson *et al.*, 2005; Lv *et al.*, 2014; Pantha & Dassanayake, 2020). However,  
513 uncontrolled initiation of autophagy signifies a failed stress response strategy (Floyd *et al.*,  
514 2015). In *A. thaliana* shoots, autophagy is the most enriched transcriptional pathway. The  
515 collective transcriptional signal enriched for lipid catabolism, protein degradation, DNA repair,  
516 cell death, and leaf senescence (Das & Roychoudhury, 2014) (Fig. 4b) further indicates the  
517 maladaptive stress response shown by *A. thaliana* contrasted against a pre-adapted state  
518 observed for *S. parvula*, when exposed to excess K<sup>+</sup> (Figs 5 and 8). Previous transcriptome and

519 metabolome characterizations from extremophytes including *S. parvula* have shown similar  
520 stress-ready states for other abiotic stresses (Kant *et al.*, 2006; Lukan *et al.*, 2010; Oh *et al.*,  
521 2014; Wang *et al.*, 2021).

522 In conclusion, upon exposure to high K<sup>+</sup>, plants undergo physiological, metabolic, and  
523 transcriptional changes and a subset of those changes lead to stress adaptive traits while the  
524 other responses are indicative of failed cellular responses unable to meet the increasing  
525 systemic toxicity exerted by excess K<sup>+</sup> accumulation. The deterministic steps whether a plant  
526 would be able to survive K-induced salt stress or descend into unmitigated stress responses  
527 were primarily dictated by the ability to regulate K uptake independent from other nutrient  
528 uptake pathways while avoiding deleterious signaling processes. This decoupled regulation of K  
529 transport and stress signaling can be targeted to design improved crops that are better able to  
530 dynamically adjust to a wide array of soils or irrigation water sources with different salt  
531 compositions increasingly comprised of high K in water-limited environments.

532

### 533 **Acknowledgements**

534 We thank Drs. Guannan Wang, Kieu-Nga Tran, Aaron Smith, and John Larkin, and Chathura  
535 Wijesinghege for providing feedback on the manuscript and facilitating helpful discussions;  
536 Prava Adhikari for additional assistance with phenotyping, and undergraduate students Saad  
537 Chaudhari, Megan Guilbeau, and August Steinkamp for their assistance to grow plants. This  
538 work was supported by the US National Science Foundation awards MCB-1616827 and IOS-  
539 EDGE-1923589, US Department of Energy BER-DE-SC0020358, and the Next-Generation  
540 BioGreen21 Program of Republic of Korea (PJ01317301) awarded to MD and DHO. PP was  
541 supported by an Economic Development Assistantship award from Louisiana State University.  
542 We acknowledge LSU High Performance Computing services for providing computational  
543 resources, and Drs. John Cheeseman and Alvaro Hernandez for their assistance with sequencing  
544 services at the University of Illinois.

545

### 546 **Author Contributions**

547 PP conducted experiments and performed data analyses. DL supervised and assisted with  
548 measuring CO<sub>2</sub> assimilation rates. DHO provided bioinformatics assistance. MD developed the  
549 experimental design and supervised the overall project. PP and MD interpreted results and  
550 wrote the article with input from all co-authors who revised and approved the final manuscript.

551

## 552 **Data Availability**

553 The RNA-seq reads generated in this study are available at NCBI-SRA database under BioProject  
554 PRJNA63667. Mapped transcripts from this study for *S. parvula* can be browsed at  
555 <https://www.lisugenomics.org/genome-browser>.

556

## 557 **References**

- 558 **Arienzo M, Christen EW, Quayle W, Kumar A. 2009.** A review of the fate of potassium in the  
559 soil-plant system after land application of wastewaters. *Journal of Hazardous Materials* **164**:  
560 415–422.
- 561 **Armengaud P, Breitling R, Amtmann A. 2004.** The potassium-dependent transcriptome of  
562 Arabidopsis reveals a prominent role of jasmonic acid in nutrient signaling. *Plant Physiology*  
563 **136**: 2556–2576.
- 564 **Ashby WC, Beadle NCW. 1957.** Studies in halophytes: III. salinity factors in the growth of  
565 Australian saltbushes. *Ecology* **38**: 344–352.
- 566 **Ashley MK, Grant M, Grabov A. 2006.** Plant responses to potassium deficiencies: A role for  
567 potassium transport proteins. *Journal of Experimental Botany* **57**: 425–436.
- 568 **Bassil E, Zhang S, Gong H, Tajima H, Blumwald E. 2019.** Cation specificity of vacuolar NHX-type  
569 cation/H<sup>+</sup> Antiporters1. *Plant Physiology* **179**: 616–629.
- 570 **Baxter IR, Ziegler G, Lahner B, Mickelbart M V, Foley R, Danku J, Armstrong P, Salt DE,**  
571 **Hoekenga OA. 2014.** Single-kernel ionomic profiles are highly heritable indicators of genetic  
572 and environmental influences on elemental accumulation in maize grain (*Zea mays*). *PLoS ONE*  
573 **9**.
- 574 **Chen CZ, Lv XF, Li JY, Yi HY, Gong JM. 2012.** Arabidopsis NRT1.5 is another essential component  
575 in the regulation of nitrate reallocation and stress tolerance. *Plant Physiology* **159**: 1582–1590.

- 576 **Coskun D, Britto DT, Kronzucker HJ. 2017.** The nitrogen–potassium intersection: membranes,  
577 metabolism, and mechanism. *Plant Cell and Environment* **40**: 2029–2041.
- 578 **Cramer GR, Epstein E, Lauchli A. 1990.** Effects of sodium, potassium and calcium on salt-  
579 stressed barley. I. Growth analysis. *Physiologia plantarum* **80**: 83–88.
- 580 **Cui Y, Li X, Yuan J, Wang F, Wang S. 2019.** Biochemical and biophysical research  
581 communications nitrate transporter NPF7.3/NRT1.5 plays an essential role in regulating  
582 phosphate deficiency responses in Arabidopsis. *Biochemical and Biophysical Research*  
583 *Communications* **508**: 314–319.
- 584 **Das K, Roychoudhury A. 2014.** Reactive oxygen species (ROS) and response of antioxidants as  
585 ROS-scavengers during environmental stress in plants. *Frontiers in Environmental Science* **2**: 1–  
586 13.
- 587 **Dassanayake M, Oh D-H, Haas JS, Hernandez A, Hong H, Ali S, Yun D-J, Bressan R a, Zhu J-K,**  
588 **Bohnert HJ, et al. 2011.** The genome of the extremophile crucifer *Thellungiella parvula*. *Nature*  
589 *genetics* **43**: 913–918.
- 590 **Daudi A, O’Brien JA. 2012.** Detection of hydrogen peroxide by DAB staining in Arabidopsis  
591 leaves. *Bio-protocol* **2**: e263.
- 592 **Demidchik V, Straltsova D, Medvedev SS, Pozhvanov GA, Sokolik A, Yurin V. 2014.** Stress-  
593 induced electrolyte leakage: the role of K<sup>+</sup>-permeable channels and involvement in  
594 programmed cell death and metabolic adjustment. *Journal of Experimental Botany* **65**: 1259–  
595 1270.
- 596 **Dietrich P, Moeder W, Yoshioka K. 2020.** Plant cyclic nucleotide-gated channels: New insights  
597 on their functions and regulation. *Plant Physiology* **184**: 27–38.
- 598 **Dijkshoorn W, Lathwell DJ, Wit CTDE. 1968.** Temporal changes in carboxylate content of  
599 ryegrass with stepwise change in nutrition. *Plant and Soil* **XXIX**.
- 600 **Dreyer I, Gomez-Porras JL, Riedelsberger J. 2017.** The potassium battery: a mobile energy  
601 source for transport processes in plant vascular tissues. *New Phytologist* **216**: 1049–1053.
- 602 **Duval JS, Carson JM, Holman PB, Darnley AG. 2005.** Terrestrial radioactivity and gamma-ray  
603 exposure in the United States and Canada. *U.S. Geological Survey Open-File Report* **1413**.
- 604 **Eijk VM. 1939.** Analysis of the effect of NaCl on development, succulence and transpiration in

605 *Salicornia herbacea*, as well as studies on the influence of salt uptake on root respiration in  
606 *Aster tripolium*. *Recueil des travaux botaniques néerlandais* **36**: 559–657.

607 **Eshel A. 1985**. Response of *Suaeda aegyptiaca* to KCl, NaCl and Na<sub>2</sub>SO<sub>4</sub> treatments. *Physiologia*  
608 *Plantarum* **64**: 308–315.

609 **Feng H, Fan X, Miller AJ, Xu G. 2020**. Plant nitrogen uptake and assimilation: Regulation of  
610 cellular pH homeostasis. *Journal of Experimental Botany* **71**: 4380–4392.

611 **Ferreira T, Rasband W. 2012**. ImageJ User Guide-IJ 1.46. [imagej.nih.gov/ij/docs/guide/](http://imagej.nih.gov/ij/docs/guide/).

612 **Fiehn O, Wohlgemuth G, Scholz M, Kind T, Lee DY, Lu Y, Moon S, Nikolau B. 2008**. Quality  
613 control for plant metabolomics: Reporting MSI-compliant studies. *Plant Journal* **53**: 691–704.

614 **Floyd BE, Pu Y, Soto-Burgos J, Bassham DC. 2015**. Plant Programmed Cell Death (AN  
615 Gunawardena and PF McCabe, Eds.). Cham: Springer International Publishing.

616 **Gasch AP, Eisen MB. 2002**. Exploring the conditional coregulation of yeast gene expression  
617 through fuzzy k-means clustering. *Genome biology* **3**.

618 **Gaymard F, Pilot G, Lacombe B, Bouchez D, Bruneau D, Boucherez J, Michaux-Ferrière N,**  
619 **Thibaud JB, Sentenac H. 1998**. Identification and disruption of a plant shaker-like outward  
620 channel involved in K<sup>+</sup> release into the xylem sap. *Cell* **94**: 647–655.

621 **Gierth M, Mäser P, Schroeder JI. 2005**. The potassium transporter AtHAK5 functions in K<sup>+</sup>  
622 deprivation-induced high-affinity K<sup>+</sup> uptake and AKT1 K<sup>+</sup> channel contribution to K<sup>+</sup> uptake  
623 kinetics in Arabidopsis roots. *Plant physiology* **137**: 1105–14.

624 **Gobert A, Park G, Amtmann A, Sanders D, Maathuis FJM. 2006**. Arabidopsis thaliana Cyclic  
625 Nucleotide Gated Channel 3 forms a non-selective ion transporter involved in germination and  
626 cation transport. *Journal of Experimental Botany* **57**: 791–800.

627 **Gong Q, Li P, Ma S, Indu Rupassara S, Bohnert HJ. 2005**. Salinity stress adaptation competence  
628 in the extremophile *Thellungiella halophila* in comparison with its relative *Arabidopsis thaliana*.  
629 *The Plant Journal* **44**: 826–839.

630 **Gu Z, Gu L, Eils R, Schlesner M, Brors B. 2014**. circlize implements and enhances circular  
631 visualization in R. *Bioinformatics* **30**: 2811–2812.

632 **Guo K, Babourina O, Christopher DA, Borsics T, Rengel Z. 2008**. The cyclic nucleotide-gated  
633 channel, AtCNGC10, influences salt tolerance in Arabidopsis. *Physiologia Plantarum* **134**: 499–

634 507.

635 **Han M, Wu W, Wu WH, Wang Y. 2016.** Potassium transporter KUP7 is involved in K<sup>+</sup> acquisition  
636 and translocation in Arabidopsis root under K<sup>+</sup>-limited conditions. *Molecular Plant* **9**: 437–446.

637 **Hauser F, Li Z, Waadt R, Schroeder JI. 2017.** SnapShot: abscisic acid signaling. *Cell* **171**: 1708-  
638 1708.e0.

639 **Hayat S, Hayat Q, Alyemeni MN, Wani AS, Pichtel J, Ahmad A. 2012.** Role of proline under  
640 changing environments. *Plant Signaling & Behavior* **7**: 1456–1466.

641 **IPCC. 2021.** Climate change 2021: The physical science basis. Contribution of working group I to  
642 the sixth assessment report of the intergovernmental panel on climate change. *Cambridge*  
643 *University Press*: 207.

644 **Ivashikina N, Dirk B, Ache P, Meyerho O, Felle HH, Hedrich R. 2001.** K<sup>+</sup> channel profile and  
645 electrical properties of Arabidopsis root hairs. *FEBS Letters* **508**: 463–469.

646 **Jabs T, Dietrich RA, Dangl JL. 1996.** Initiation of runaway cell death in an Arabidopsis mutant by  
647 extracellular superoxide. *Science* **273**: 1853–1856.

648 **Ji Y, Li Q, Liu G, Selvaraj G, Zheng Z, Zou J, Wei Y. 2019.** Roles of cytosolic glutamine  
649 synthetases in Arabidopsis development and stress responses. *Plant and Cell Physiology* **60**:  
650 657–671.

651 **Kant S, Kant P, Raveh E, Barak S. 2006.** Evidence that differential gene expression between the  
652 halophyte, *Thellungiella halophila*, and *Arabidopsis thaliana* is responsible for higher levels of  
653 the compatible osmolyte proline and tight control of Na<sup>+</sup> uptake in T. halophila. *Plant, Cell and*  
654 *Environment* **29**: 1220–1234.

655 **Kim MJ, Ruzicka D, Shin R, Schachtman DP. 2012.** The Arabidopsis AP2/ERF transcription factor  
656 RAP2.11 modulates plant response to low-potassium conditions. *Molecular Plant* **5**: 1042–1057.

657 **Kishor PBK, Hong Z, Miao C-H, Hu C-AA, Verma DPS. 1995.** Overexpression of A1-pyrroline-5-  
658 carboxylate synthetase increases proline production and confers osmotolerance in transgenic  
659 plants. *Plant Physiology* **108**: 1387–1394.

660 **Kolde R. 2012.** pheatmap v.1.0.8. <https://cran.r-project.org/package=pheatmap>: 1–7.

661 **Kumar V, Shriram V, Kishor PBK. 2010.** Enhanced proline accumulation and salt stress  
662 tolerance of transgenic indica rice by over-expressing P5CSF129A gene. *Plant Biotechnol Rep* **4**:

663 37–48.

664 **Lequeux H, Hermans C, Lutts S, Verbruggen N. 2010.** Response to copper excess in *Arabidopsis*  
665 *thaliana*: Impact on the root system architecture, hormone distribution, lignin accumulation  
666 and mineral profile. *Plant Physiology and Biochemistry* **48**: 673–682.

667 **Li JY, Fu YL, Pike SM, Bao J, Tian W, Zhang Y, Chen CZ, Zhang Y, Li HM, Huang J, et al. 2010.** The  
668 *Arabidopsis* nitrate transporter NRT1.8 functions in nitrate removal from the xylem sap and  
669 mediates cadmium tolerance. *Plant Cell* **22**: 1633–1646.

670 **Li H, Yu M, Du XQ, Wang ZF, Wu WH, Quintero FJ, Jin XH, Li HD, Wang Y. 2017.** NRT1.5/NPF7.3  
671 functions as a proton-coupled H<sup>+</sup>/K<sup>+</sup> antiporter for K<sup>+</sup> loading into the xylem in *Arabidopsis*.  
672 *Plant Cell* **29**: 2016–2026.

673 **Liu Y, Schiff M, Czymmek K, Tallóczy Z, Levine B, Dinesh-Kumar SP. 2005.** Autophagy regulates  
674 programmed cell death during the plant innate immune response. *Cell* **121**: 567–577.

675 **Love MI, Huber W, Anders S. 2014.** Moderated estimation of fold change and dispersion for  
676 RNA-seq data with DESeq2. *Genome biology* **15**: 550.

677 **Lugan R, Niogret MF, Lepout L, Guégan JP, Larher FR, Sauré A, Kopka J, Bouchereau A. 2010.**  
678 Metabolome and water homeostasis analysis of *Thellungiella salsuginea* suggests that  
679 dehydration tolerance is a key response to osmotic stress in this halophyte. *Plant Journal* **64**:  
680 215–229.

681 **Lv X, Pu X, Qin G, Zhu T, Lin H. 2014.** The roles of autophagy in development and stress  
682 responses in *Arabidopsis thaliana*. *Apoptosis* **19**: 905–921.

683 **Maathuis FJ. 2009.** Physiological functions of mineral macronutrients. *Current Opinion in Plant*  
684 *Biology* **12**: 250–258.

685 **Maeda Y, Konishi M, Kiba T, Sakuraba Y, Sawaki N, Kurai T, Ueda Y, Sakakibara H, Yanagisawa**  
686 **S. 2018.** A NIGT1-centred transcriptional cascade regulates nitrate signalling and incorporates  
687 phosphorus starvation signals in *Arabidopsis*. *Nature Communications*.

688 **Maere S, Heymans K, Kuiper M. 2005.** BiNGO: A Cytoscape plugin to assess overrepresentation  
689 of Gene Ontology categories in Biological Networks. *Bioinformatics* **21**: 3448–3449.

690 **Matoh T, Watanabe J, Takahashi E. 1986.** Effects of sodium and potassium salts on the growth  
691 of a halophyte. *Soil Science and Plant Nutrition* **32**: 451–459.



- 692 **Nilhan TG, Emre YA, Osman K. 2008.** Soil determinants for distribution of *Halocnemum*  
693 *strobilaceum* Bieb. (Chenopodiaceae) around Lake Tuz, Turkey. *Pakistan Journal of Biological*  
694 *Sciences* **11**: 565–570.
- 695 **Nishizawa A, Yabuta Y, Shigeoka S. 2008.** Galactinol and raffinose constitute a novel function  
696 to protect plants from oxidative damage. *Plant Physiology* **147**: 1251–1263.
- 697 **O’Brien JAA, Vega A, Bouguyon E, Krouk G, Gojon A, Coruzzi G, Gutiérrez RAA. 2016.** Nitrate  
698 transport, sensing, and responses in plants. *Molecular Plant* **9**: 837–856.
- 699 **Oh D-H, Dassanayake M. 2019.** Landscape of gene transposition-duplication within the  
700 Brassicaceae family. *DNA Research* **26**: 21–36.
- 701 **Oh D-H, Hong H, Lee SY, Yun D-J, Bohnert HJ, Dassanayake M. 2014.** Genome structures and  
702 transcriptomes signify niche adaptation for the multi-ion tolerant extremophyte *Schrenkiella*  
703 *parvula*. *Plant Physiol* **164**: 2123–2138.
- 704 **Oh D-H, Leidi E, Zhang Q, Hwang S-M, Li Y, Quintero FJ, Jiang X, D’Urzo MP, Lee SY, Zhao Y, et**  
705 **al. 2009.** Loss of halophytism by interference with SOS1 expression. *Plant physiology* **151**: 210–  
706 222.
- 707 **Osakabe Y, Arinaga N, Umezawa T, Katsura S, Nagamachi K, Tanaka H, Ohiraki H, Yamada K,**  
708 **Seo S-U, Abo M, et al. 2013.** Osmotic stress responses and plant growth controlled by  
709 potassium transporters in *Arabidopsis*. *The Plant Cell* **25**: 609–624.
- 710 **Pantha P, Dassanayake M. 2020.** Living with salt. *The Innovation* **1**: 100050.
- 711 **Ragel P, Ródenas R, García-martín E, Andrés Z, Villalta I, Nieves-cordones M, Rivero RM,**  
712 **Martínez V, Pardo JM, Quintero FJ, et al. 2015.** The CBL-interacting protein kinase CIPK23  
713 regulates HAK5-mediated high-affinity K<sup>+</sup> uptake in *Arabidopsis* roots. *Plant Physiology* **169**:  
714 2863–2873.
- 715 **Ramos J, López MJ, Benlloch M. 2004.** Effect of NaCl and KCl salts on the growth and solute  
716 accumulation of the halophyte *Atriplex nummularia*. *Plant and Soil* **259**: 163–168.
- 717 **Richter JA, Behr JH, Erban A, Kopka J, Zörb C. 2019.** Ion-dependent metabolic responses of  
718 *Vicia faba* L. to salt stress. *Plant Cell and Environment* **42**: 295–309.
- 719 **Ródenas R, Martínez V, Nieves-cordones M, Rubio F. 2019.** High external K<sup>+</sup> concentrations  
720 impair Pi nutrition, induce the phosphate starvation response, and reduce Arsenic toxicity in

- 721 Arabidopsis plants. *International Journal of Molecular Sciences* **20**: 1–18.
- 722 **Shabala S. 2017.** Signalling by potassium: Another second messenger to add to the list? *Journal*  
723 *of Experimental Botany* **68**: 4003–4007.
- 724 **Shabala S, Cuin TA. 2008.** Potassium transport and plant salt tolerance. *Physiologia Plantarum*  
725 **133**: 651–669.
- 726 **Shi H, Ishitani M, Kim C, Zhu J-K. 2000.** The *Arabidopsis thaliana* salt tolerance gene SOS1  
727 encodes a putative Na<sup>+</sup>/H<sup>+</sup> antiporter. *Proceedings of the National Academy of Sciences* **97**:  
728 6896–6901.
- 729 **Straub T, Ludewig U, Neuhäuser B. 2017.** The kinase CIPK23 inhibits ammonium transport in  
730 *Arabidopsis thaliana*. *The Plant cell* **29**: 409–422.
- 731 **Szyroki A, Ivashikina N, Dietrich P, Roelfsema MRG, Ache P, Reintanz B, Deeken R, Godde M,**  
732 **Felle H, Steinmeyer R, et al. 2001.** KAT1 is not essential for stomatal opening. *Proceedings of*  
733 *the National Academy of Sciences of the United States of America* **98**: 2917–2921.
- 734 **Taji T, Ohsumi C, Iuchi S, Seki M, Kasuga M, Kobayashi M, Yamaguchi-Shinozaki K, Shinozaki**  
735 **K. 2002.** Important roles of drought- and cold-inducible genes for galactinol synthase in stress  
736 tolerance in *Arabidopsis thaliana*. *The Plant Journal* **29**: 417–426.
- 737 **Tegeder M, Masclaux-Daubresse C. 2018.** Source and sink mechanisms of nitrogen transport  
738 and use. *New Phytologist* **217**: 35–53.
- 739 **Thompson AR, Doelling JH, Suttangkakul A, Vierstra RD. 2005.** Autophagic nutrient recycling in  
740 *Arabidopsis* directed by the ATG8 and ATG12 conjugation pathways. *Plant physiology* **138**:  
741 2097–2110.
- 742 **Voelker C, Schmidt D, Mueller-roeber B, Czempinski K. 2006.** Members of the Arabidopsis  
743 AtTPK/KCO family form homomeric vacuolar channels in planta. *The Plant Journal* **48**: 296–306.
- 744 **Wang X-P, Chen L-M, Liu W-X, Shen L-K, Wang F-L, Zhou Y, Zhang Z, Wu W-H, Wang Y. 2016.**  
745 AtKC1 and CIPK23 synergistically modulate AKT1-mediated low-potassium stress responses in  
746 *Arabidopsis*. *Plant Physiology* **170**: 2264–2277.
- 747 **Wang G, DiTusa SF, Oh DH, Herrmann AD, Mendoza-Cozatl DG, O'Neill MA, Smith AP,**  
748 **Dassanayake M. 2021.** Cross species multi-omics reveals cell wall sequestration and elevated  
749 global transcription as mechanisms of boron tolerance in plants. *New Phytologist*.

- 750 **Wang B, Lüttge U, Ratajczak R. 2001.** Effects of salt treatment and osmotic stress on V-ATPase  
751 and V-PPase in leaves of the halophyte *Suaeda salsa*. *Journal of Experimental Botany* **52**: 2355–  
752 2365.
- 753 **Wang G, Oh D, Dassanayake M. 2020.** GOMCL: a toolkit to cluster, evaluate, and extract non-  
754 redundant associations of gene ontology-based functions. *BMC bioinformatics* **21**: 1–9.
- 755 **Wang Y, Wu W-H. 2013.** Potassium transport and signaling in higher plants. *Annual Review of*  
756 *Plant Biology* **64**: 451–476.
- 757 **Warren JK. 2016.** Potash resources: occurrences and controls. In: Evaporites. Cham: Springer  
758 International Publishing, 1081–1185.
- 759 **Yoshitake Y, Nakamura S, Shinozaki D, Izumi M. 2021.** RCB-mediated chlorophagy caused by  
760 oversupply of nitrogen suppresses phosphate-starvation stress in plants. *Plant physiology* **185**:  
761 318–330.
- 762 **Yuan L, Loqué D, Kojima S, Rauch S, Ishiyama K, Inoue E, Takahashi H, Von Wirén N. 2007.** The  
763 organization of high-affinity ammonium uptake in *Arabidopsis* roots depends on the spatial  
764 arrangement and biochemical properties of AMT1-type transporters. *The Plant Cell* **19**: 2636–  
765 2652.
- 766 **Yuen CCY, Christopher DA. 2013.** The group IV-A cyclic nucleotide-gated channels, CNGC19 and  
767 CNGC20, localize to the vacuole membrane in *Arabidopsis thaliana*. *AoB PLANTS* **5**: 1–14.
- 768 **Zhang G Bin, Yi HY, Gong JM. 2014.** The *Arabidopsis* Ethylene/Jasmonic acid-NRT signaling  
769 module coordinates nitrate reallocation and the trade-off between growth and environmental  
770 adaptation. *Plant Cell* **26**: 3984–3998.
- 771 **Zhao W, Faust F, Schubert S. 2020.** Potassium is a potential toxicant for *Arabidopsis thaliana*  
772 under saline conditions. *Journal of Plant Nutrition and Soil Science* **183**: 455–467.
- 773 **Zhao S, Zhang M, Ma T-L, Wang Y. 2016.** Phosphorylation of ARF2 relieves its repression of  
774 transcription of the K<sup>+</sup> transporter gene HAK5 in response to low potassium stress. *The Plant*  
775 *Cell* **28**: 3005–3019.
- 776 **Zheng S, Pan T, Fan L, Qiu Q. 2013.** A novel AtKEA gene family, homolog of bacterial K<sup>+</sup>/H<sup>+</sup>  
777 antiporters, plays potential roles in K<sup>+</sup> homeostasis and osmotic adjustment in *Arabidopsis* (J  
778 Kleine-Vehn, Ed.). *PLoS ONE* **8**: e81463.

779 **Ziegler G, Terauchi A, Becker A, Armstrong P, Hudson K, Baxter I. 2013.** Ionomic screening of  
780 field-grown soybean identifies mutants with altered seed elemental composition. *The Plant*  
781 *Genome* **6**: 0.

782 **Zioni A BEN, Vaadia Y, Lips SH. 1971.** Nitrate uptake by roots as regulated by nitrate reduction  
783 products of the shoot. *Physiologia Plantarum* **24**: 288–290.

784

## 785 **Figure caption**

786 **Fig. 1** KCl is more toxic than NaCl at the same osmotic strength. (a) Seedlings of *Arabidopsis*  
787 *thaliana* (left on each plate) and *Schrenkiella parvula* (right on each plate) on 1/4<sup>th</sup> MS media  
788 supplemented with 0 to 200 mM NaCl or KCl. Black line on plates mark end of root tips. (b)  
789 Primary root length, lateral root number, and lateral root density measured on 17-day-old  
790 seedlings grown under conditions used in (a) based on a 12-day treatment of NaCl or KCl. (c)  
791 Average root hair length of 10 longest root hairs measured under the same growth conditions  
792 used in (a) monitored for a week. (d) Total leaf area per plant measured when plants developed  
793 the first floral bud following 1-2 weeks of salt treatments in a hydroponic medium. (e)  
794 Photosynthesis measured as the rate of CO<sub>2</sub> assimilation of the entire shoot/rosette in 25-day-  
795 old hydroponically grown plants and monitored up to 72 HAT. (f) Total carbon as a % weight  
796 based on total dry mass for root and shoot tissue under conditions used in (e). Minimum 5  
797 plants per condition used in b and c and a minimum of 3 plants per condition used for d and e.  
798 Asterisks indicate significant changes between the treated samples to its respective control  
799 samples (t-test with  $p \leq 0.05$ ). Black lines above bars in (b) and (d) mark the conditions where K  
800 causes a severe reduction than Na compared to the control at similar K and Na concentrations.  
801 Data are presented as mean of at least 3 independent biological replicates  $\pm$  SD. Open circles  
802 indicate the measurements from each plant (b-c) and replicate (d-f). DAT-Days after treatment,  
803 HAT- Hours after treatment.

804 **Fig. 2** Excess K accumulation cause severe nutrient imbalance in *A. thaliana* compared to *S.*  
805 *parvula*. (a) Total potassium (K) accumulation between *A. thaliana* and *S. parvula*. (b) Total  
806 nitrogen (N) levels in *A. thaliana* and *S. parvula*. (c) Ionomic profiles of 15 nutrients and 6 other  
807 elements quantified during excess K<sup>+</sup> treatments. (d) Percent change in CNPK elemental content

808 in roots and shoots of *A. thaliana* and *S. parvula* during excess K<sup>+</sup> treatments. Data are  
809 represented as mean of at least 4 (for a and c) and 3 (for b) independent replicates with  $\pm$  SD  
810 based on 5-8 hydroponically grown plants per replicate. Total elemental compositions reported  
811 after normalization for dry weight. Significant differences are based on one-way ANOVA  
812 followed by Tukey's post-hoc test,  $p$ -value  $\leq 0.05$ . Asterisks or different letters assigned to bars  
813 in a, b, and d indicate significant differences between treatments and control. Open circles  
814 indicate data from each replicate. HAT- Hours after treatment.

815 **Fig. 3** *S. parvula* metabolome is more responsive than *A. thaliana* and induces specific  
816 antioxidants and osmoprotectants during excess K<sup>+</sup> stress. (a) Correlation between *A.*  
817 *thaliana* and *S. parvula* quantified overall metabolome profiles. Pearson correlation  
818 coefficient is calculated for 145 known metabolites ( $r$ ) and all metabolites including the  
819 unannotated metabolites ( $r'$ ). (b) Known metabolites that significantly changed in abundance  
820 (MACs) at 24 and 72 hours after treatment (HAT). (c) Overview of the temporal changes in  
821 primary metabolite pools based on broad functional groups. The numbers indicate MACs  
822 followed by ("/") the total number metabolites quantified in each group. (d) Metabolites in  
823 each functional group mapped to represent their abundance starting at basal level (inner  
824 circles) to 24 and 72 HAT. Antioxidants and osmolytes highlighted in Results are marked with  
825 arrowheads in the outer circles. Significance tests for metabolite abundance (to detects  
826 MACs) were performed with one-way ANOVA followed by Tukey's post-hoc test,  $p$ -value  $\leq 0.05$ .  
827 Data presented as mean of at least 3 independent replicates  $\pm$  SD given using  $\geq 5$  hydroponically  
828 grown plants per replicate. HAT- Hours after treatment.

829 **Fig. 4** *A. thaliana* shows an overall non-selective transcriptional response during excess K<sup>+</sup> stress  
830 than *S. parvula*. (a) Principal component (PC) analysis of 23,281 ortholog pairs expressed  
831 between *A. thaliana* and *S. parvula* root and shoot transcriptomes at 0, 3, 24, and 72 hours  
832 after treatment (HAT). (b) Temporally enriched functional processes based on GO annotations  
833 associated with differently expressed genes (DEGs) in *A. thaliana*. The temporal sequence is  
834 given as 3 h specific, 3 and 24 h shared with 24 h specific, 24 h and 72 h shared, 72 h specific,  
835 and present at all-time points from 3-24-72 h. Functional processes that were detected at least  
836 in two time points are shown and the processes are sorted based on their functional hierarchy

837 when applicable. (c) Leaves stained for hydrogen peroxide ( $H_2O_2$ ) and superoxide ions ( $O_2^-$ ).  
838 Similar growth and treatment conditions used for the RNAseq study. (d) Transcriptional profiles  
839 of selected pathways associated with stress signaling. DEGs were called using DESeq2 with a p-  
840 adj value based on Benjamini-Hochberg correction for multiple testing set to  $\leq 0.01$ . Data  
841 presented as mean of 3 independent replicates  $\pm$  SD given using  $\geq 5$  hydroponically grown  
842 plants per replicate.

843 **Fig. 5** *S. parvula* shows a confined transcriptomic response geared toward concurrent induction  
844 of abiotic stress responses and enhanced transcriptional allocation to C and N metabolism.

845 (a) The overall expression specificity and response direction of orthologs in *A. thaliana* and *S.*  
846 *parvula*. Selected orthologs are differentially expressed genes (DEGs) at least in one time point  
847 compared to the respective control condition and then counted as a non-redundant set when  
848 all 3, 24, and 72 HAT samples were considered for total counts. (b) The proportion contributing  
849 to abiotic and biotic stress stimuli within non-redundant DEGs. (c) The functionally enriched  
850 processes represented by DEGs in *S. parvula* that responded to high  $K^+$ . A non-redundant set  
851 from all time points (3, 24, and 72 HAT) were used. A node in each cluster represents a gene  
852 ontology (GO) term; size of a node represents the number of genes included in that GO term;  
853 the clusters that represent similar functions share the same color and are given a  
854 representative cluster name and ID; and the edges between nodes show the DEGs that are  
855 shared between functions. All clusters included in the network have adj p-values  $\leq 0.05$  with  
856 false discovery rate correction applied. More significant values are represented by darker node  
857 colors. DEGs determined at p-adj value set to  $\leq 0.01$ . Data presented as mean of 3 independent  
858 replicates;  $\pm$  SD given using  $\geq 5$  hydroponically grown plants per replicate. HAT- Hours after  
859 treatment.

860 **Fig. 6** Differential expression of  $K^+$  transporters in *A. thaliana* and *S. parvula*. (a) Basal level  
861 expression comparison of orthologs between *A. thaliana* and *S. parvula* in roots and shoots. The  
862 dash-gray diagonal line marks identical expression in both species and solid red lines represent  
863 a 2-fold change in one species compared to the other species. Orthologs encoding  
864 transporters/channels with  $\geq 2$ -fold change differences between the species are labeled. (b) The  
865 temporal expression profiles of  $K^+$  transporters and channels in *A. thaliana* and their *S. parvula*

866 orthologs upon high K<sup>+</sup> treatment. (c) Key K<sup>+</sup> transporters and channels differently regulated  
867 between roots and shoots in *A. thaliana* and *S. parvula*. DEGs determined at p-adj value set to  
868 ≤0.01 compared to 0 HAT (Hours after treatment). Data presented as means of 3 independent  
869 replicates; ± SD given using ≥ 5 hydroponically grown plants per replicate.

870 **Fig. 7** Molecular phenotypes associated with excess K<sup>+</sup> induced nitrogen starvation and  
871 suppressed N-assimilation in *A. thaliana* compared to *S. parvula*. (a) Net expression changes  
872 associated with major nitrogen transporters in *A. thaliana* that regulate root uptake and long-  
873 distance transport of N. (b) Coordinated transcriptional profiles of nitrogen assimilation and  
874 accumulation of glutamate-derived osmoprotectants and antioxidants. The arrows in front of  
875 heatmap blocks indicate the direction of the reaction in the pathway. DEGs determined at p-adj  
876 value set to ≤0.01 compared to 0 HAT (Hours after treatment). (c) Primary metabolites derived  
877 from glutamate in roots and shoots. Asterisks indicate significant changes in  
878 metabolite abundances based on one-way ANOVA followed by Tukey's post-hoc test, *p*-  
879 value ≤0.05. Data presented as mean of at least 3 independent replicates; ± SD based on ≥ 5  
880 hydroponically grown plants per replicate. Open circles indicate data from each replicate.

881 **Fig. 8** Co-expressed ortholog gene modules highlight stress preparedness for excess K<sup>+</sup> in *S.*  
882 *parvula* orthologs that are constitutively expressed compared to induction or suppression of *A.*  
883 *thaliana* orthologs. Normalized gene expression clusters of ortholog pairs (OP) between *A.*  
884 *thaliana* and *S. parvula* in (a) roots and (b) shoots. Fuzzy K-means clustering of temporally co-  
885 expressed OPs with a membership cutoff of ≤0.5. Box and whisker plots present the median  
886 expression at each time point given by the thick line within the box; interquartile range  
887 between first and third quartile given by the height of the box; and interquartile range x 1.5  
888 marked by whiskers for lower and upper extremes. Basal level taken as 0 HAT (Hours after  
889 treatment) in *A. thaliana* is marked by a grey line in all plots. Each cluster was used for a  
890 functional enrichment analysis represented by GOMCL summaries placed below co-expression  
891 plots. A node in each cluster represents a gene ontology (GO) term; size of a node  
892 represents the number of genes included in that GO term; the clusters that represent similar  
893 functions share the same color and are given a representative cluster name; and the edges  
894 between nodes show the orthologs that are shared between functions. All clusters included in

895 the network have adj p-values  $\leq 0.05$  with false discovery rate corrections applied. More  
896 significant enrichments are represented by darker nodes.

897 **Fig. 9** Cellular processes that determine stress resilient growth from stress-affected growth  
898 during K-induced salt stress.

899

#### 900 **Supplementary figure caption**

901 **Fig. S1** Sampling scheme for the ionome, metabolome, and transcriptome assessments  
902 performed in this study. 25-day-old *Arabidopsis thaliana* and *Schrenkiella parvula* plants were  
903 grown in 1/5<sup>th</sup> Hoagland's solution with/without supplemental 150 mM KCl for up to 72 hours  
904 after treatment (HAT). All samples were 28-day-old at the time of harvest. Shoot and root tissue  
905 samples were harvested on a randomized basis from the same growth chamber, at the same  
906 time of day for control and salt-treated plants. Roots were briefly dried with a paper towel to  
907 soak any excess growth solution. All treatment and harvest times were set at 4 h after the  
908 beginning of the light cycle to avoid variation due to circadian effects. The salt treatment was  
909 non-lethal to both *A. thaliana* and *S. parvula* plants based on preliminary tests using a series of  
910 salt concentrations. Both ionome and metabolome profiles have 4 biological replicates and  
911 transcriptome samples have 3 biological replicates. Each replicate contains tissues from at least  
912 5 different plants.

913 **Fig. S2** KCl is more toxic than NaCl at the same osmotic strength at the end of the lifecycle. (a)  
914 21-day-old plants treated for 14 days (salt applied every other day). *A. thaliana* plants treated  
915 with KCl show severe growth disruptions compared to the treatments given with the same  
916 concentration of NaCl. In *A. thaliana*, 200 mM KCl treated plants did not develop any flowers at  
917 the completion of the experiment with 20 days of monitoring after treatment ended, whereas  
918 plants treated with 200 mM NaCl flowered and developed siliques. *S. parvula* showed a similar  
919 observation at 400 mM KCl treatment compared to NaCl treatment. Yellow arrowhead indicates  
920 the absence of floral development. (b) Number of siliques quantified from NaCl and KCl treated  
921 plants shown in (a). A minimum of 3 plants per condition were used for both species. Asterisks  
922 indicate significant changes between the treated samples to its respective control samples (t-



923 test with  $p \leq 0.05$ ). Data presented as mean of at least 3 independent biological replicates with  $\pm$   
924 SD. DAT- Days after treatment.

925 **Fig. S3** KCl is more toxic than NaCl at the same osmotic strength at the vegetative growth  
926 phases. Effects on (a) primary root length, (b) leaf area, and (c) root hair development upon  
927 high Na and K treatments compared to their respective controls. Primary root length was  
928 measured on 17-day-old seedlings grown on 1/4<sup>th</sup> MS media supplemented with 0 to 200 mM  
929 NaCl or KCl based on a 12-day treatment. Total leaf area per plant measured when plants  
930 developed the first floral bud following 1-2 weeks of salt treatments in a hydroponic medium.  
931 Minimum 5 plants per condition used in (a) and a minimum of 3 plants per condition used for  
932 (b). Same roots were photographed on 3, 5, and 7 DAT (Days after treatment).

933 **Fig. S4** Carbohydrate and nitrogen metabolism related processes were enriched  
934 in *S. parvula* roots. (a) Enriched metabolic pathways in *A. thaliana* and *S. parvula* in response to  
935 excess K stress. Metabolite Enrichment Analysis was performed with MetaboAnalyst with a p-  
936 adj cut off set to  $\leq 0.05$ . p-values were adjusted using Benjamini-Hochberg correction for  
937 multiple testing. (b) Simplified galactose metabolism pathway (KEGG Pathway ID:ath00052). The  
938 seven metabolites that significantly changed in abundance and quantified using GC-MS are  
939 indicated in bold font.

940 **Fig. S5** Overview of transcriptomes in each condition tested in response to high K stress in *A.*  
941 *thaliana* and *S. parvula* roots. (a) Principal component analysis (PCA) for 0, 3, 24, and 72 hours  
942 after treatment (HAT) for *A. thaliana* and *S. parvula* roots and shoots. (b) Overall transcript level  
943 correlation between conditions. Correlation plots were generated  
944 using PerformanceAnalytics library in R 4.0.2. Pearson correlation coefficient is given for each  
945 comparison.

946 **Fig. S6** The majority of differentially expressed genes (DEGs) show species specific responses  
947 followed by tissue and response time specificity. Differentially expressed genes  
948 (DEGs) between *A. thaliana* and *S. parvula* for (a) roots and (b) shoots. Enriched functions are  
949 highlighted for diametric and shared responses between differently regulated ortholog pairs  
950 (OP). DEGs at each time point were called using DESeq2 compared to 0 h with a p-adj value

951 based on Benjamini-Hochberg correction for multiple testing set to  $\leq 0.01$ . The  
952 shared genes were plotted using UpsetR in R 4.0.2.  
953 **Fig. S7** Genes coding for calcium signaling and aquaporins are differently regulated during high  
954  $K^+$  stress. Genes associated with (a) calcium signaling pathway and (b) aquaporins during high  $K^+$   
955 in root and shoot of *A. thaliana* and *S. parvula*. The significantly changed genes at least in one  
956 condition are presented in the heatmap. DEGs at each time point were called using  
957 DESeq2 compared to 0 h with a p-adj value based on Benjamini-Hochberg correction for  
958 multiple testing set to  $\leq 0.01$ .

959 **Fig. S8** Normalized expression of *SOS1* in roots and shoots of *A. thaliana* and *S. parvula* under  
960 150 mM KCl treatments. \* represent DEGs at each time point called using DESeq2 compared to  
961 0 h with a p-adj value based on Benjamini-Hochberg correction for multiple testing set to  $\leq 0.01$ .  
962 Open circles indicate the measurement from each replicate.

963

#### 964 **Supplementary table title**

965 **Table S1** Relative abundance of metabolites for *A. thaliana* and *S. parvula* roots and shoots  
966 sample. 25-days-old hydroponically grown seedlings were treated for 24 and 72 hours after 150  
967 mM KCl treatment and control samples were harvested together with the treated samples.  
968 Data are represented as the mean of at least 3 independent replicates.  $\geq 5$  plants per replicate  
969 were used.

970 **Table S2** Number of total reads and percentage of uniquely mapped reads to *A. thaliana*  
971 (TAIR10) or *S. parvula* v2.2 gene models for root and shoot transcriptomes under high  $K^+$ . At- *A.*  
972 *thaliana*, Sp- *S. parvula*, C- control, 3- 3 hours after treatment, 24- 24 hours after treatment, 72-  
973 72 hours after treatment, R- root samples, S- shoot samples. 25-days-old hydroponically grown  
974 seedlings were treated for 3, 24, and 72 h after 150 mM KCl treatment. Control samples were  
975 harvested together with the treated samples. Data are represented as the mean of at least 3  
976 independent replicates.  $\geq 5$  plants per replicate were used.

977 **Table S3** List of differentially expressed genes (DEGs) in 3, 24, and 72 hours after treatment  
978 (HAT) in *A. thaliana* and *S. parvula* root and shoot. DEGs were called using DESeq2 with a p-adj  
979 value based on Benjamini-Hochberg correction for multiple testing set to  $< 0.01$ . Data are

980 represented as mean of 3 independent replicates  $\pm$  SD given using  $\geq$  5 hydroponically grown  
981 plants per replicate.

982 **Table S4** Enriched biological processes for a non-redundant set of induced and suppressed  
983 DEGs for *A. thaliana* roots and shoots sample under 150 mM KCl. DEGs were functionally  
984 annotated by a Gene Ontology (GO) enrichment test using BinGO in Cytoscape and enriched  
985 biological processes were further clustered based on shared genes using GOMCL with adj *p*-  
986 value  $<0.05$  after false discovery rate correction with Benjamini-Hochberg correction.

987 **Table S5** Enriched biological processes for time point-specific DEGs (3, 3&24+24, 24&72, 72,  
988 and 3&24&72) for *A. thaliana* roots sample under 150 mM KCl. DEGs were functionally  
989 annotated by a Gene Ontology (GO) enrichment test using BinGO in Cytoscape and enriched  
990 biological processes were further clustered based on shared genes using GOMCL with adj *p*-  
991 value  $<0.05$  after false discovery rate correction with Benjamini-Hochberg correction.

992 **Table S6** Enriched biological processes for time point-specific DEGs (3, 3&24+24, 24&72, 72,  
993 and 3&24&72) for *A. thaliana* shoots sample under 150 mM KCl. DEGs were functionally  
994 annotated by a Gene Ontology (GO) enrichment test using BinGO in Cytoscape and enriched  
995 biological processes were further clustered based on shared genes using GOMCL with adj *p*-  
996 value  $<0.05$  after false discovery rate correction with Benjamini-Hochberg correction.

997 **Table S7** Enriched biological processes for time point-specific (3, 3&24, 24, 24&72, 72, and  
998 3&24&72) induced and suppressed DEGs for *A. thaliana* roots sample under 150 mM KCl. DEGs  
999 were functionally annotated by a Gene Ontology (GO) enrichment test using BinGO in  
1000 Cytoscape and enriched biological processes were further clustered based on shared genes  
1001 using GOMCL with adj *p*-value  $<0.05$  after false discovery rate correction with Benjamini-  
1002 Hochberg correction.

1003 **Table S8** Enriched biological processes for time point-specific (3, 3&24, 24, 24&72, 72, and  
1004 3&24&72) induced and suppressed DEGs for *A. thaliana* shoots sample under 150 mM KCl.  
1005 DEGs were functionally annotated by a Gene Ontology (GO) enrichment test using BinGO in  
1006 Cytoscape and enriched biological processes were further clustered based on shared genes  
1007 using GOMCL with adj *p*-value  $<0.05$  after false discovery rate correction with Benjamini-  
1008 Hochberg correction.

1009 **Table S9** Enriched biological processes for diametric responses (*i.e.* genes that are induced in  
1010 one species when their orthologs are suppressed in the other species) in *A. thaliana* and *S.*  
1011 *parvula* roots and shoots sample under 150 mM KCl. The pattern is extracted from Fig S6. DEGs  
1012 were functionally annotated by a Gene Ontology (GO) enrichment test using BinGO in  
1013 Cytoscape and enriched biological processes were further clustered based on shared genes  
1014 using GOMCL with adj *p*-value <0.05 after false discovery rate correction with Benjamini-  
1015 Hochberg correction.

1016 **Table S10** Enriched biological processes for a non-redundant set of induced and suppressed  
1017 DEGs for *S. parvula* roots and shoots sample under 150 mM KCl. The *S. parvula* DEG orthologs  
1018 with *A. thaliana* were functionally annotated by a Gene Ontology (GO) enrichment test using  
1019 BinGO in Cytoscape and enriched biological processes were further clustered based on shared  
1020 genes using GOMCL with adj *p*-value <0.05 after false discovery rate correction with Benjamini-  
1021 Hochberg correction.

1022 **Table S11** Normalized gene expression clusters of ortholog pairs (OP) between *A. thaliana* and  
1023 *S. parvula* in roots and shoots sample. Fuzzy K-means clustering was used to find temporally co-  
1024 regulated clusters with a membership cutoff of >0.5. From initially identified 10 root and 11  
1025 shoot clusters, we filtered out clusters that did not show a response to K treatments in both  
1026 species and identified 5 root (RC1, RC2, RC3, RC4, and RC5) and 3 shoot (SC1, SC2, and SC3) co-  
1027 expression superclusters with distinct response trends. The orthologs from each cluster were  
1028 functionally annotated by a Gene Ontology (GO) enrichment test using BinGO in Cytoscape and  
1029 enriched biological processes were further clustered based on shared genes using GOMCL with  
1030 adj *p*-value <0.05 after false discovery rate correction with Benjamini-Hochberg correction.

1031  
1032  
1033  
1034  
1035  
1036  
1037  
1038  
1039  
1040  
1041

1042 **Figures**

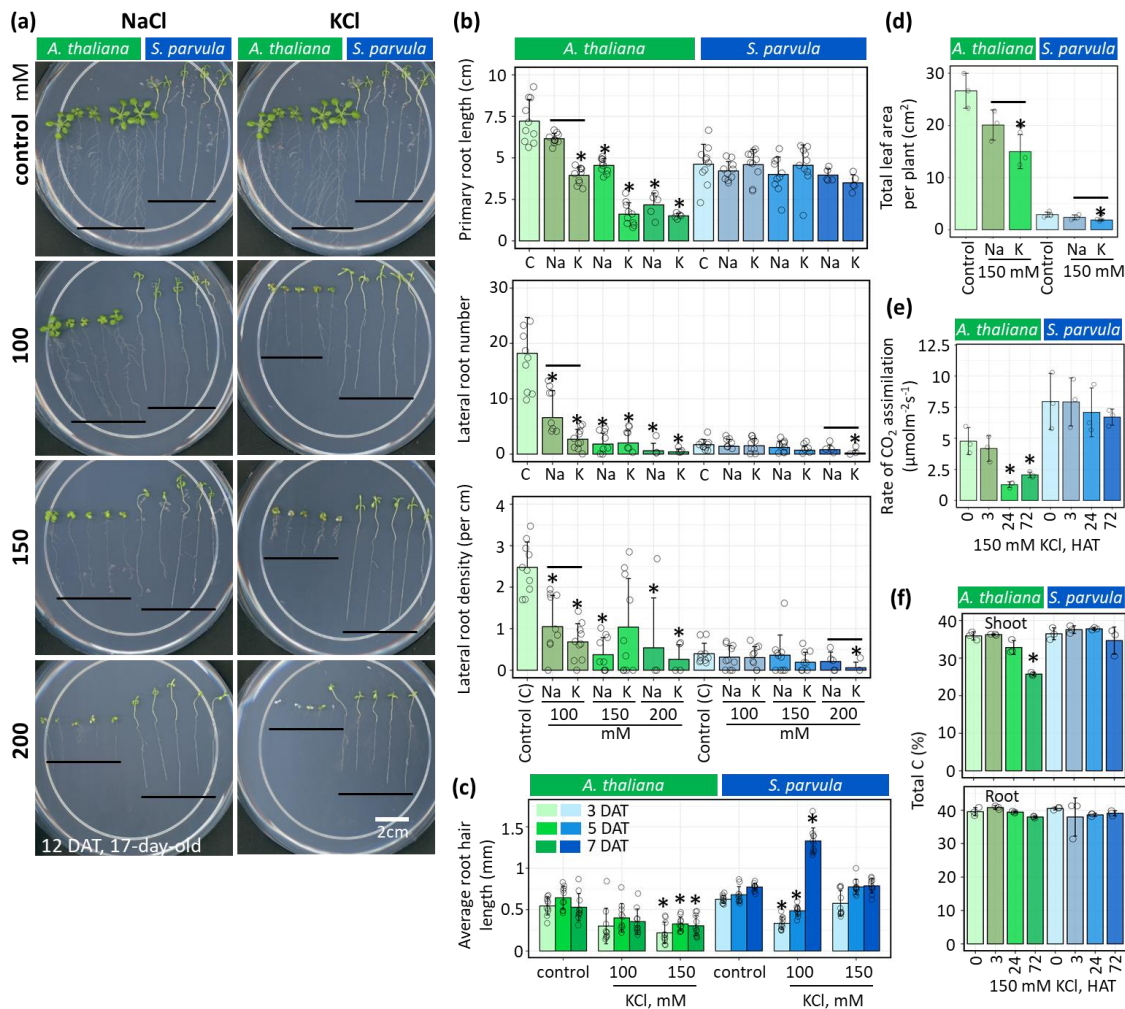

**Fig. 1** KCl is more toxic than NaCl at the same osmotic strength. (a) Seedlings of *Arabidopsis thaliana* (left on each plate) and *Schrenkiella parvula* (right on each plate) on 1/4<sup>th</sup> MS media supplemented with 0 to 200 mM NaCl or KCl. Black line on plates mark end of root tips. (b) Primary root length, lateral root number, and lateral root density measured on 17-day-old seedlings grown under conditions used in (a) based on a 12-day treatment of NaCl or KCl. (c) Average root hair length of 10 longest root hairs measured under the same growth conditions used in (a) monitored for a week. (d) Total leaf area per plant measured when plants developed the first floral bud following 1-2 weeks of salt treatments in a hydroponic medium. (e) Photosynthesis measured as the rate of CO<sub>2</sub> assimilation of the entire shoot/rosette in 25-day-old hydroponically grown plants and monitored up to 72 HAT. (f) Total carbon as a % weight based on total dry mass for root and shoot tissue under conditions used in (e). Minimum 5 plants per condition used in b and c and a minimum of 3 plants per condition used for d and e. Asterisks indicate significant changes between the treated samples to its respective control samples (t-test with p ≤ 0.05). Black lines above bars in (b) and (d) mark the conditions where K causes a severe reduction than Na compared to the control at similar K and Na concentrations. Data are presented as mean of at least 3 independent biological replicates ± SD. Open circles indicate the measurements from each plant (b-c) and replicate (d-f). DAT-Days after treatment, HAT- Hours after treatment.

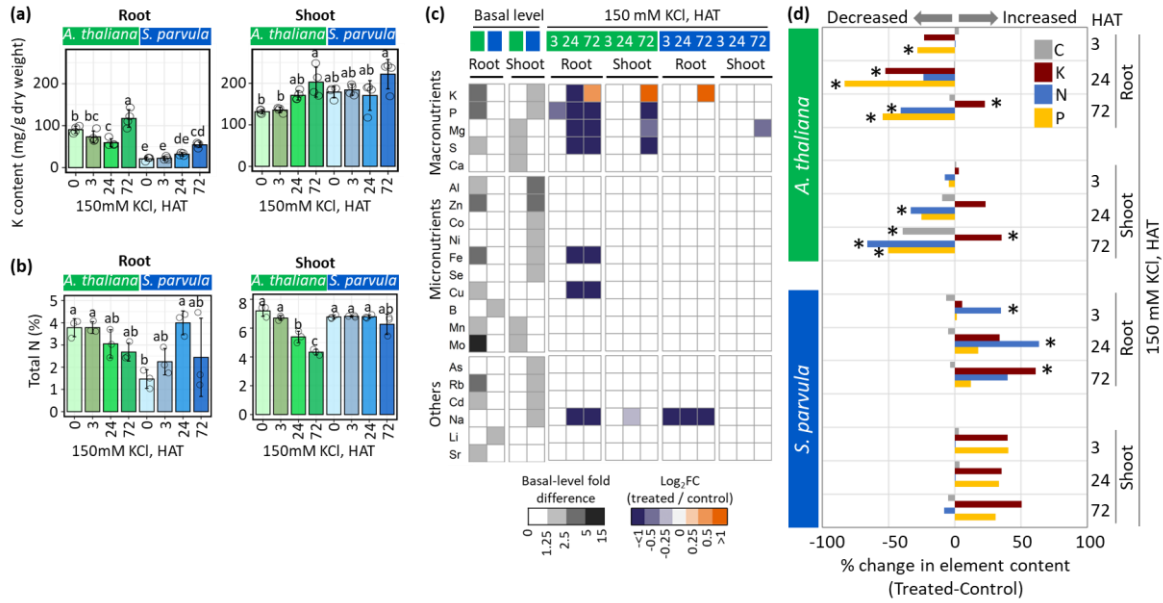

**Fig. 2** Excess K accumulation cause severe nutrient imbalance in *A. thaliana* compared to *S. parvula*. (a) Total potassium (K) accumulation between *A. thaliana* and *S. parvula*. (b) Total nitrogen (N) levels in *A. thaliana* and *S. parvula*. (c) Ionomic profiles of 15 nutrients and 6 other elements quantified during excess K<sup>+</sup> treatments. (d) Percent change in CNPK elemental content in roots and shoots of *A. thaliana* and *S. parvula* during excess K<sup>+</sup> treatments. Data are represented as mean of at least 4 (for a and c) and 3 (for b) independent replicates with  $\pm$  SD based on 5-8 hydroponically grown plants per replicate. Total elemental compositions reported after normalization for dry weight. Significant differences are based on one-way ANOVA followed by Tukey's post-hoc test,  $p$ -value  $\leq 0.05$ . Asterisks or different letters assigned to bars in a, b, and d indicate significant differences between treatments and control. Open circles indicate data from each replicate. HAT- Hours after treatment.

1044

1045

1046

1047

1048

1049

1050

1051

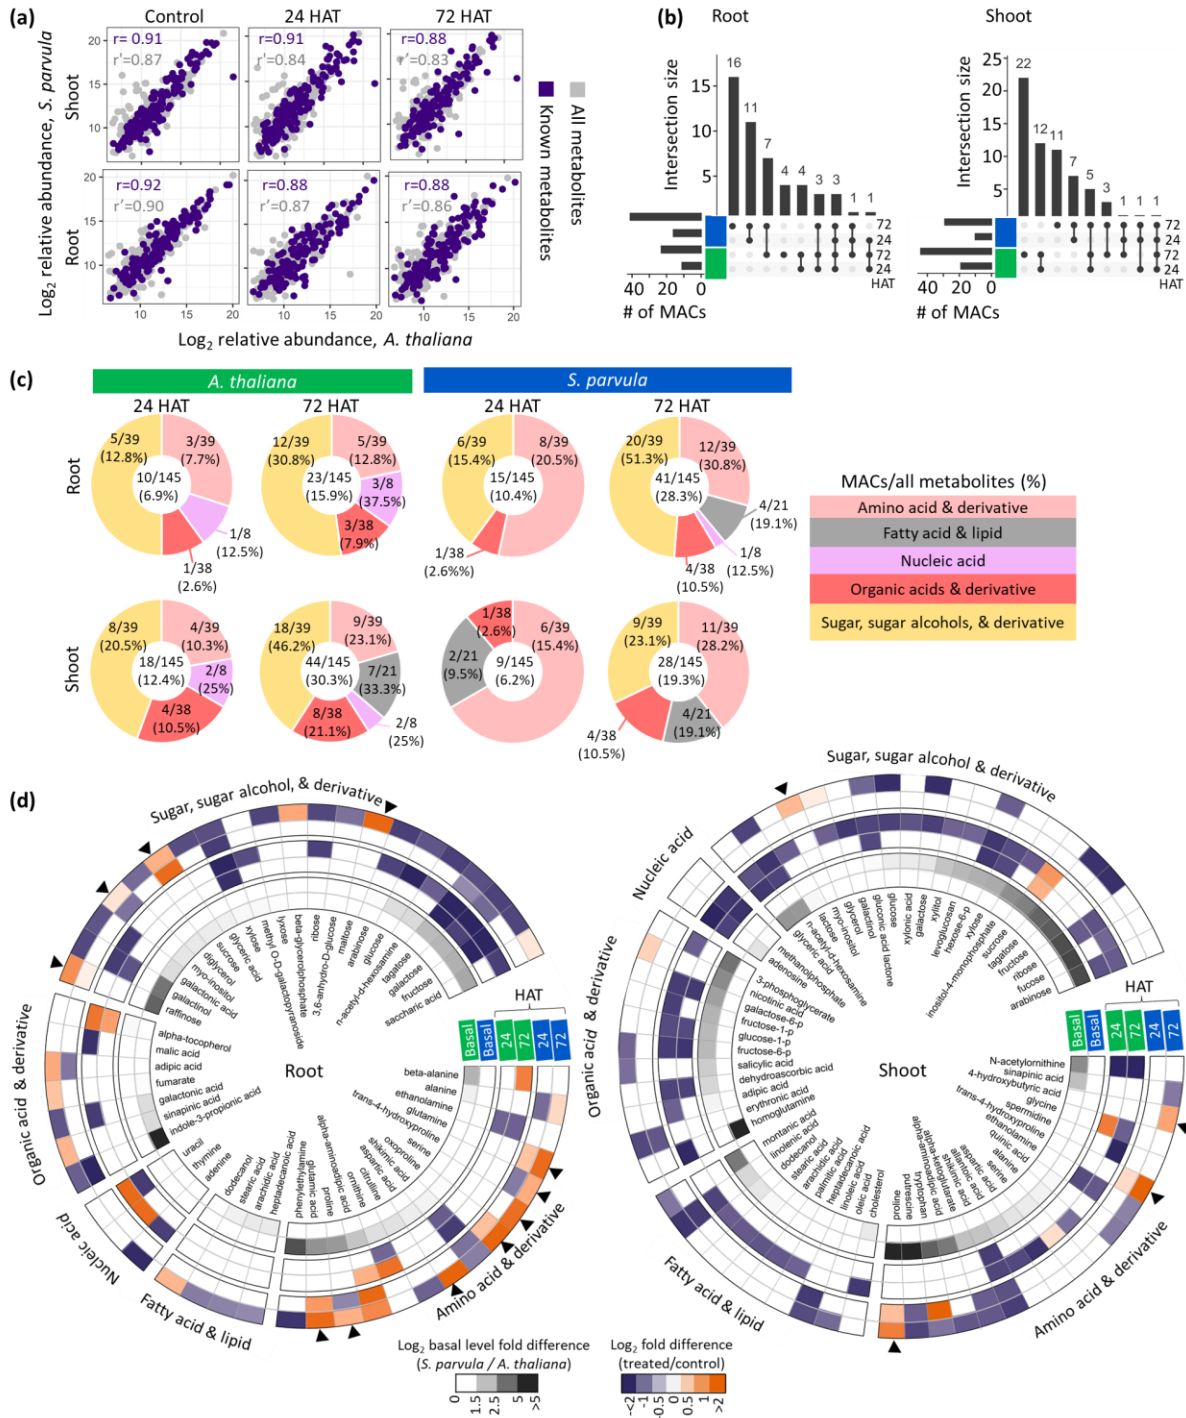

1052  
1053  
1054  
1055  
1056

**Fig. 3** *S. parvula* metabolome is more responsive than *A. thaliana* and induces specific antioxidants and osmoprotectants during excess K<sup>+</sup> stress. (a) Correlation between *A. thaliana* and *S. parvula* quantified overall metabolome profiles. Pearson correlation coefficient is calculated for 145 known metabolites (*r*) and all metabolites including the unannotated metabolites (*r'*). (b) Known metabolites that significantly changed in abundance (MACs) at 24 and 72 hours after treatment (HAT). (c) Overview of the temporal changes in primary metabolite pools based on broad functional groups. The numbers indicate MACs followed by (“/”) the total number metabolites quantified in each group. (d) Metabolites in each functional group mapped to represent their abundance starting at basal level (inner circles) to 24 and 72 HAT. Antioxidants and osmolytes highlighted in Results are marked with arrowheads in the outer circles. Significance tests for metabolite abundance (to detects MACs) were performed with one-way ANOVA followed by Tukey’s post-hoc test, *p*-value ≤0.05. Data presented as mean of at least 3 independent replicates ± SD given using ≥ 5 hydroponically grown plants per replicate. HAT- Hours after treatment.

1057  
1058  
1059  
1060  
1061  
1062  
1063  
1064  
1065  
1066  
1067  
1068  
1069  
1070  
1071  
1072  
1073  
1074  
1075  
1076  
1077



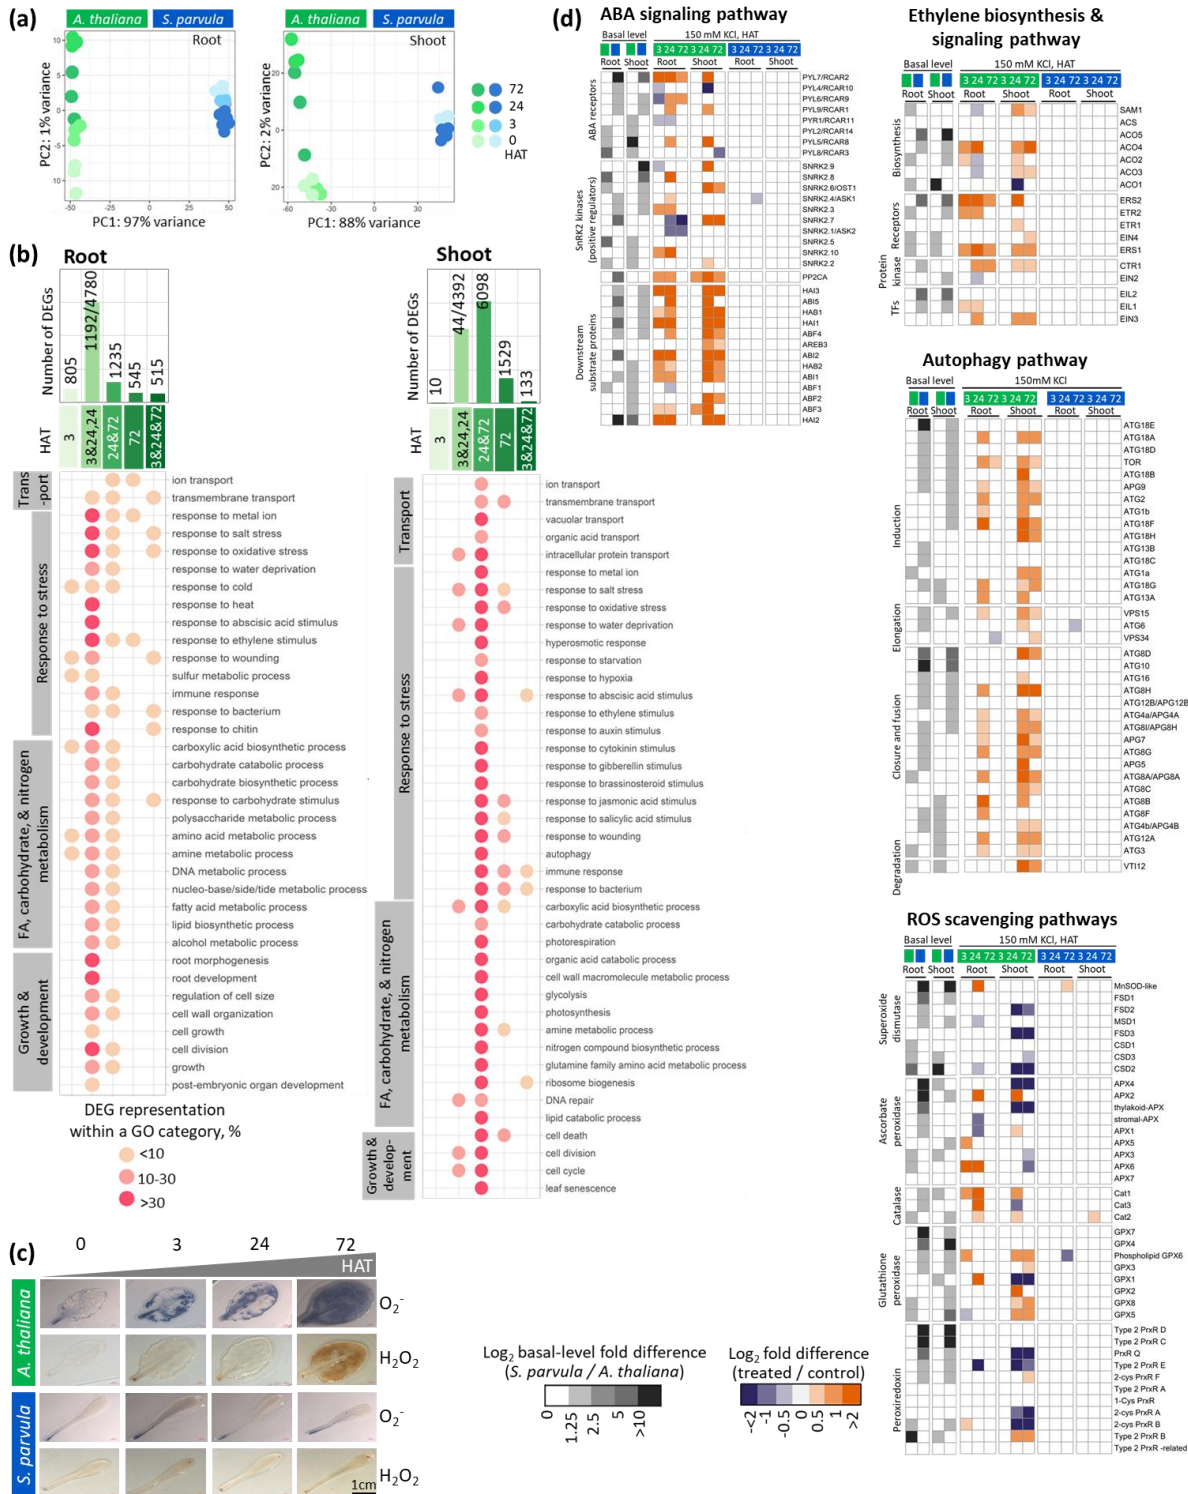

1078

1079

1080

**Fig. 4** *A. thaliana* shows an overall non-selective transcriptional response during excess K<sup>+</sup> stress than *S. parvula*. (a) Principal component (PC) analysis of 23,281 ortholog pairs expressed between *A. thaliana* and *S. parvula* root and shoot transcriptomes at 0, 3, 24, and 72 hours after treatment (HAT). (b) Temporally enriched functional processes based on GO annotations associated with differently expressed genes (DEGs) in *A. thaliana*. The temporal sequence is given as 3 h specific, 3 and 24 h shared with 24 h specific, 24 h and 72 h shared, 72 h specific, and present at all-time points from 3-24-72 h. Functional processes that were detected at least in two time points are shown and the processes are sorted based on their functional hierarchy when applicable. (c) Leaves stained for hydrogen peroxide (H<sub>2</sub>O<sub>2</sub>) and superoxide ions (O<sub>2</sub><sup>-</sup>). Similar growth and treatment conditions used for the RNAseq study. (d) Transcriptional profiles of selected pathways associated with stress signaling. DEGs were called using DESeq2 with a p-adj value based on Benjamini-Hochberg correction for multiple testing set to ≤0.01. Data presented as mean of 3 independent replicates ± SD given using ≥ 5 hydroponically grown plants per replicate.

1081  
1082  
1083  
1084  
1085  
1086  
1087  
1088  
1089  
1090  
1091  
1092  
1093  
1094  
1095  
1096  
1097

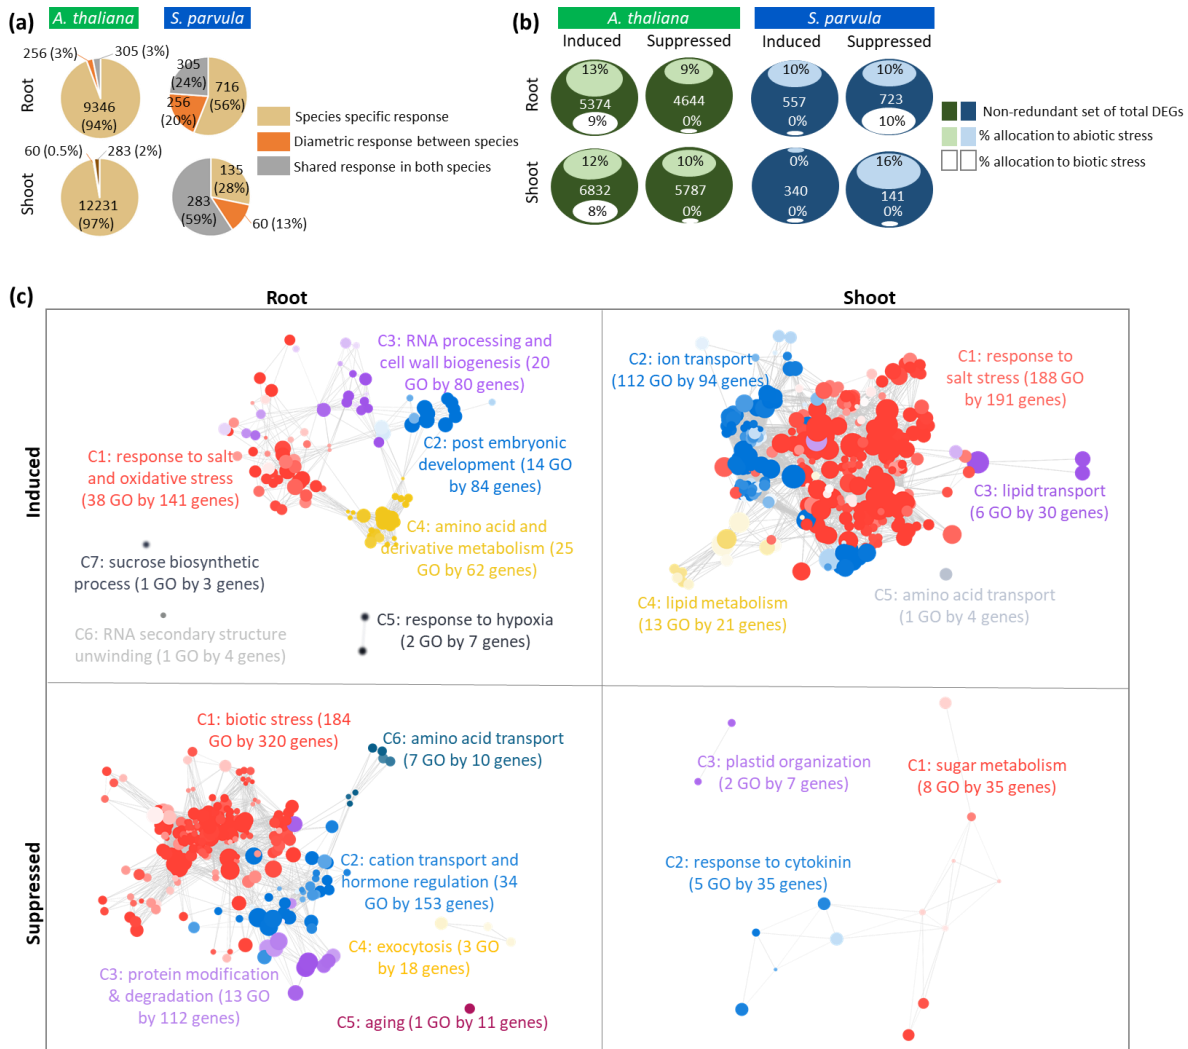

**Fig. 5** *S. parvula* shows a confined transcriptomic response geared toward concurrent induction of abiotic stress responses and enhanced transcriptional allocation to C and N metabolism. (a) The overall expression specificity and response direction of orthologs in *A. thaliana* and *S. parvula*. Selected orthologs are differentially expressed genes (DEGs) at least in one time point compared to the respective control condition and then counted as a non-redundant set when all 3, 24, and 72 HAT samples were considered for total counts. (b) The proportion contributing to abiotic and biotic stress stimuli within non-redundant DEGs. (c) The functionally enriched processes represented by DEGs in *S. parvula* that responded to high  $K^+$ . A non-redundant set from all time points (3, 24, and 72 HAT) were used. A node in each cluster represents a gene ontology (GO) term; size of a node represents the number of genes included in that GO term; the clusters that represent similar functions share the same color and are given a representative cluster name and ID; and the edges between nodes show the DEGs that are shared between functions. All clusters included in the network have adj p-values  $\leq 0.05$  with false discovery rate correction applied. More significant values are represented by darker node colors. DEGs determined at p-adj value set to  $\leq 0.01$ . Data presented as mean of 3 independent replicates;  $\pm$  SD given using  $\geq 5$  hydroponically grown plants per replicate. HAT- Hours after treatment.

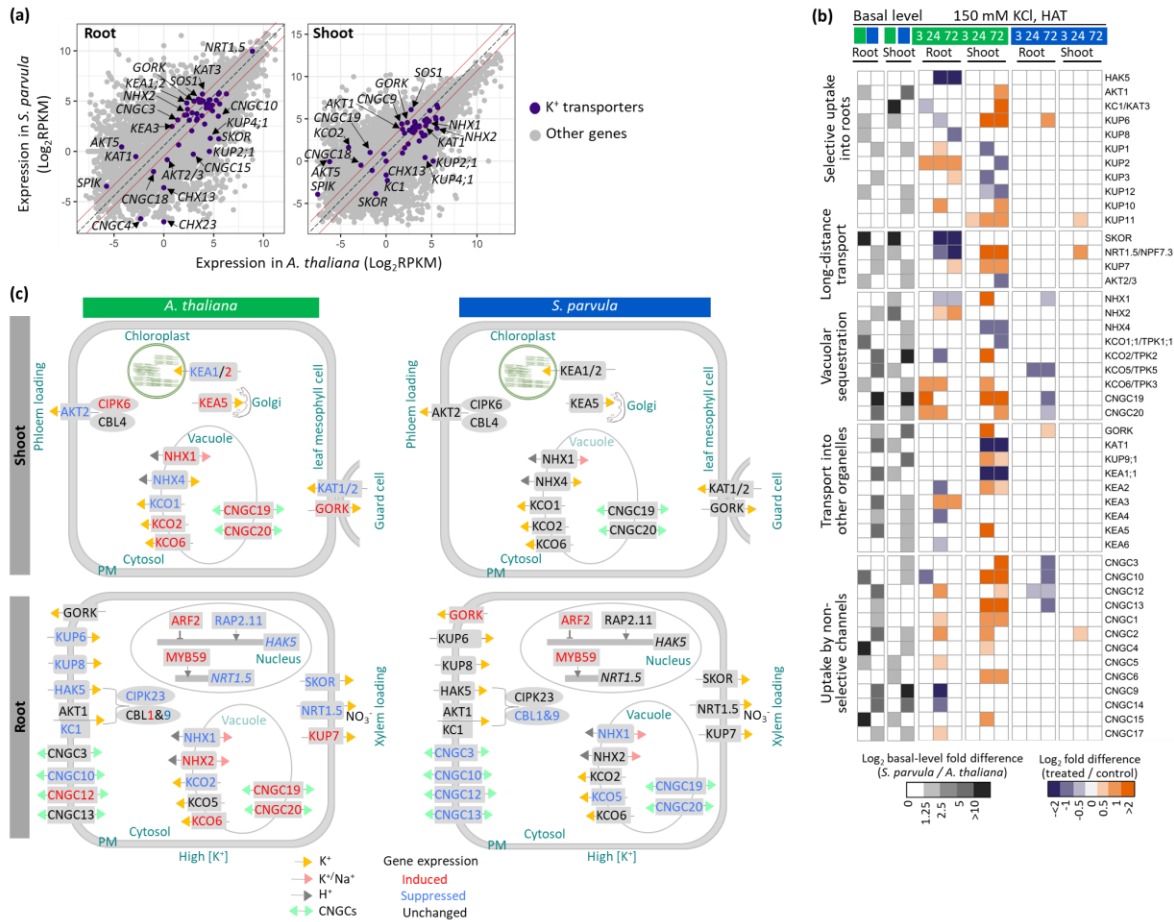

**Fig. 6** Differential expression of K<sup>+</sup> transporters in *A. thaliana* and *S. parvula*. (a) Basal level expression comparison of orthologs between *A. thaliana* and *S. parvula* in roots and shoots. The dash-gray diagonal line marks identical expression in both species and solid red lines represent a 2-fold change in one species compared to the other species. Orthologs encoding transporters/channels with ≥2-fold change differences between the species are labeled. (b) The temporal expression profiles of K<sup>+</sup> transporters and channels in *A. thaliana* and their *S. parvula* orthologs upon high K<sup>+</sup> treatment. (c) Key K<sup>+</sup> transporters and channels differently regulated between roots and shoots in *A. thaliana* and *S. parvula*. DEGs determined at p-adj value set to ≤0.01 compared to 0 HAT (Hours after treatment). Data presented as means of 3 independent replicates; ± SD given using ≥ 5 hydroponically grown plants per replicate.

1099  
1100  
1101  
1102  
1103  
1104

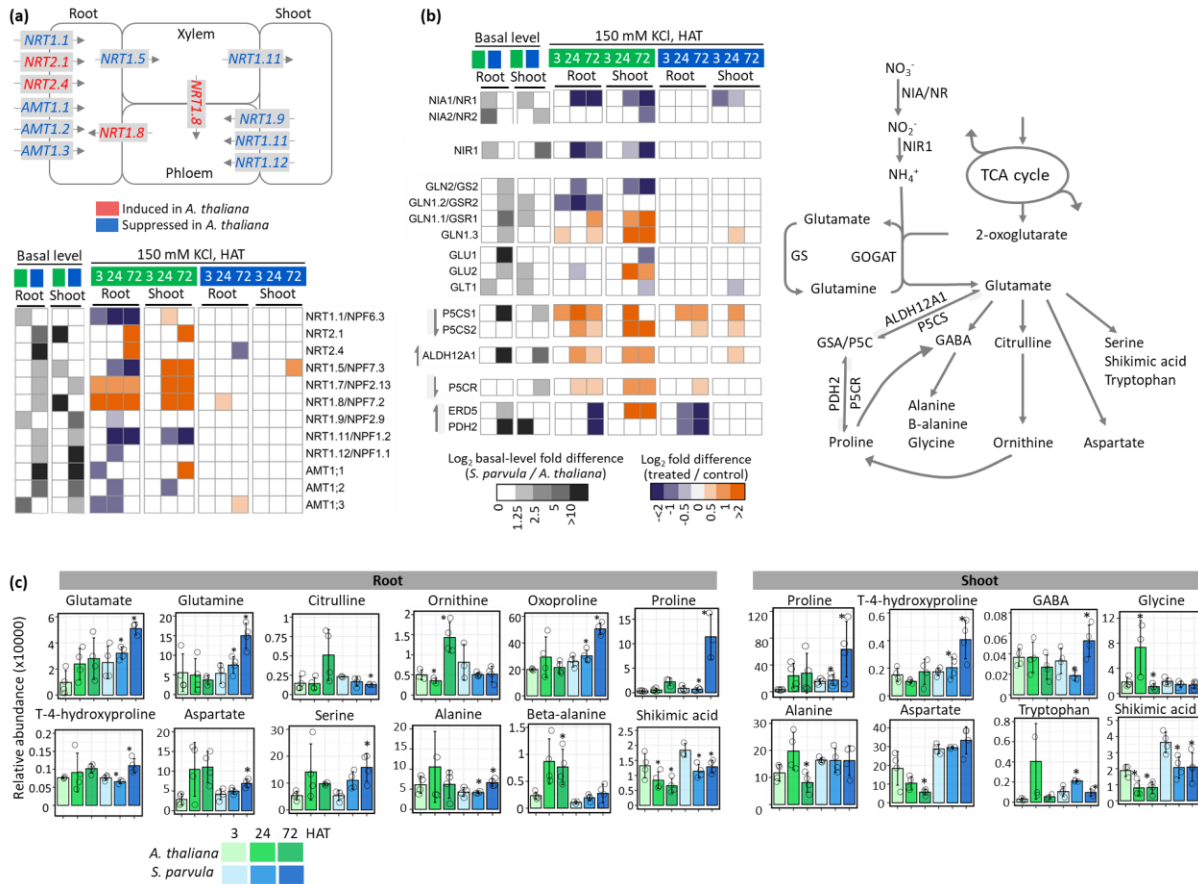

**Fig. 7** Molecular phenotypes associated with excess  $K^+$  induced nitrogen starvation and suppressed N-assimilation in *A. thaliana* compared to *S. parvula*. (a) Net expression changes associated with major nitrogen transporters in *A. thaliana* that regulate root uptake and long-distance transport of N. (b) Coordinated transcriptional profiles of nitrogen assimilation and accumulation of glutamate-derived osmoprotectants and antioxidants. The arrows in front of heatmap blocks indicate the direction of the reaction in the pathway. DEGs determined at  $p$ -adj value set to  $\leq 0.01$  compared to 0 HAT (Hours after treatment). (c) Primary metabolites derived from glutamate in roots and shoots. Asterisks indicate significant changes in metabolite abundances based on one-way ANOVA followed by Tukey's post-hoc test,  $p$ -value  $\leq 0.05$ . Data presented as mean of at least 3 independent replicates;  $\pm$  SD based on  $\geq 5$  hydroponically grown plants per replicate. Open circles indicate data from each replicate.

1105

1106

1107

1108

1109

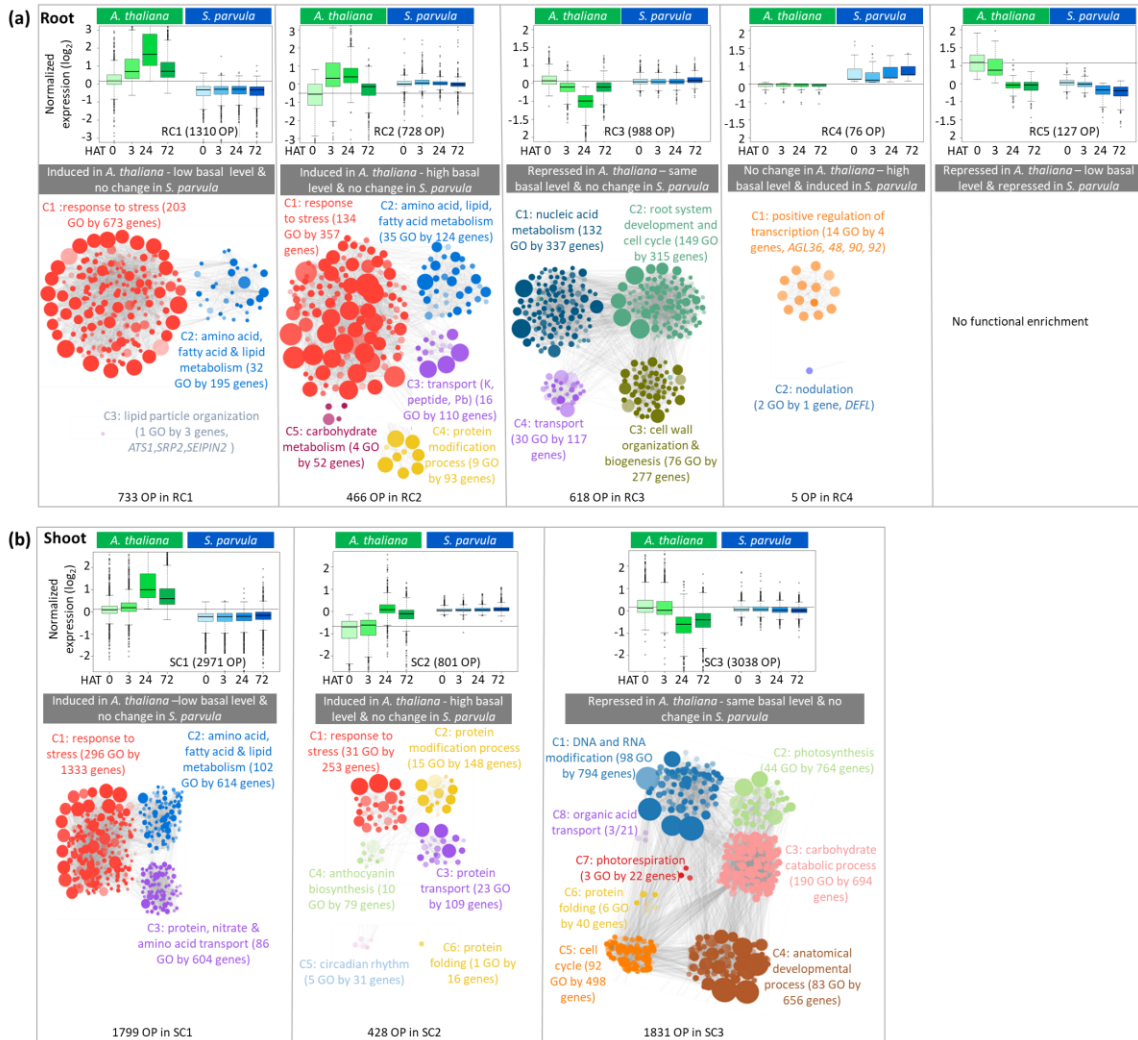

**Fig. 8** Co-expressed ortholog gene modules highlight stress preparedness for excess  $K^+$  in *S. parvula* orthologs that are constitutively expressed compared to induction or suppression of *A. thaliana* orthologs. Normalized gene expression clusters of ortholog pairs (OP) between *A. thaliana* and *S. parvula* in (a) roots and (b) shoots. Fuzzy K-means clustering of temporally co-expressed OPs with a membership cutoff of  $\leq 0.5$ . Box and whisker plots present the median expression at each time point given by the thick line within the box; interquartile range between first and third quartile given by the height of the box; and interquartile range  $\times 1.5$  marked by whiskers for lower and upper extremes. Basal level taken as 0 HAT (Hours after treatment) in *A. thaliana* is marked by a grey line in all plots. Each cluster was used for a functional enrichment analysis represented by GOMCL summaries placed below co-expression plots. A node in each cluster represents a gene ontology (GO) term; size of a node represents the number of genes included in that GO term; the clusters that represent similar functions share the same color and are given a representative cluster name; and the edges between nodes show the orthologs that are shared between functions. All clusters included in the network have adj p-values  $\leq 0.05$  with false discovery rate corrections applied. More significant enrichments are represented by darker nodes.

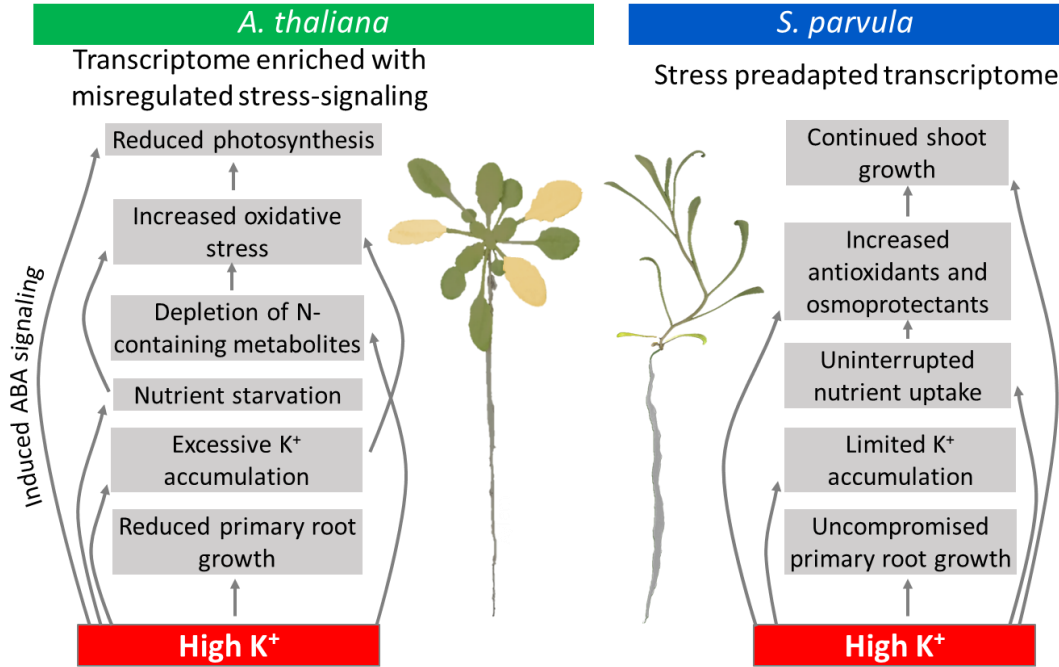

**Fig. 9** Cellular processes that determine stress resilient growth from stress-affected growth during K-induced salt stress.

1111  
1112  
1113  
1114  
1115  
1116  
1117  
1118  
1119  
1120  
1121  
1122  
1123  
1124  
1125  
1126  
1127  
1128  
1129  
1130

1131 **Supplementary figures**

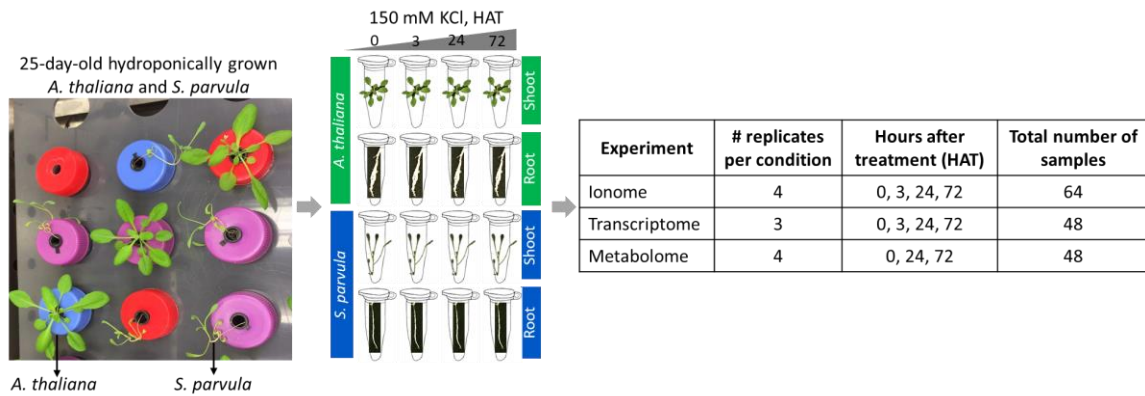

**Fig. S1** Sampling scheme for the ionome, metabolome, and transcriptome assessments performed in this study. 25-day-old *Arabidopsis thaliana* and *Schrenkiella parvula* plants were grown in 1/5<sup>th</sup> Hoagland's solution with/without supplemental 150 mM KCl for up to 72 hours after treatment (HAT). All samples were 28-day-old at the time of harvest. Shoot and root tissue samples were harvested on a randomized basis from the same growth chamber, at the same time of day for control and salt-treated plants. Roots were briefly dried with a paper towel to soak any excess growth solution. All treatment and harvest times were set at 4 h after the beginning of the light cycle to avoid variation due to circadian effects. The salt treatment was non-lethal to both *A. thaliana* and *S. parvula* plants based on preliminary tests using a series of salt concentrations. Both ionome and metabolome profiles have 4 biological replicates and transcriptome samples have 3 biological replicates. Each replicate contains tissues from at least 5 different plants.

1132

1133



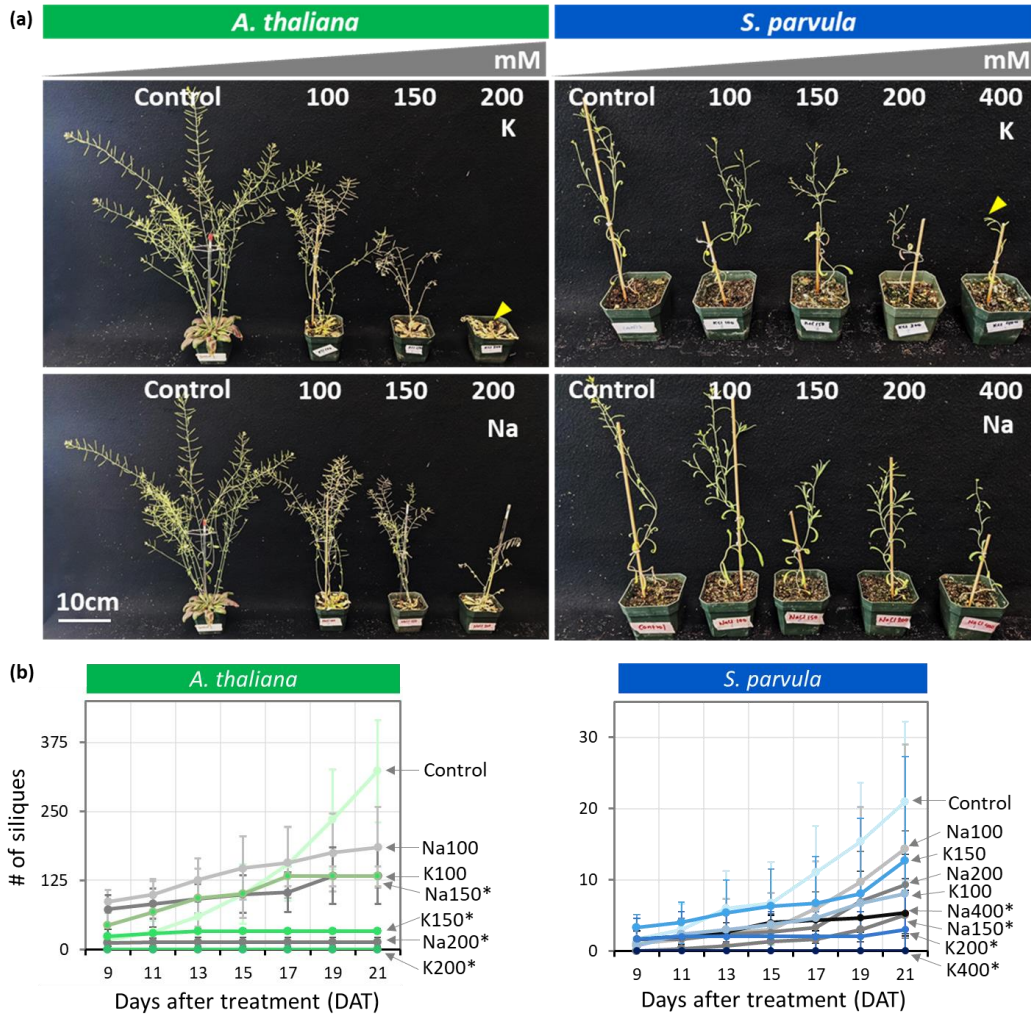

**Fig. S2** KCl is more toxic than NaCl at the same osmotic strength at the end of the lifecycle. (a) 21-day-old plants treated for 14 days (salt applied every other day). *A. thaliana* plants treated with KCl show severe growth disruptions compared to the treatments given with the same concentration of NaCl. In *A. thaliana*, 200 mM KCl treated plants did not develop any flowers at the completion of the experiment with 20 days of monitoring after treatment ended, whereas plants treated with 200 mM NaCl flowered and developed siliques. *S. parvula* showed a similar observation at 400 mM KCl treatment compared to NaCl treatment. Yellow arrowhead indicates the absence of floral development. (b) Number of siliques quantified from NaCl and KCl treated plants shown in (a). A minimum of 3 plants per condition were used for both species. Asterisks indicate significant changes between the treated samples to its respective control samples (t-test with  $p \leq 0.05$ ). Data presented as mean of at least 3 independent biological replicates with  $\pm$  SD. DAT- Days after treatment.

1134

1135

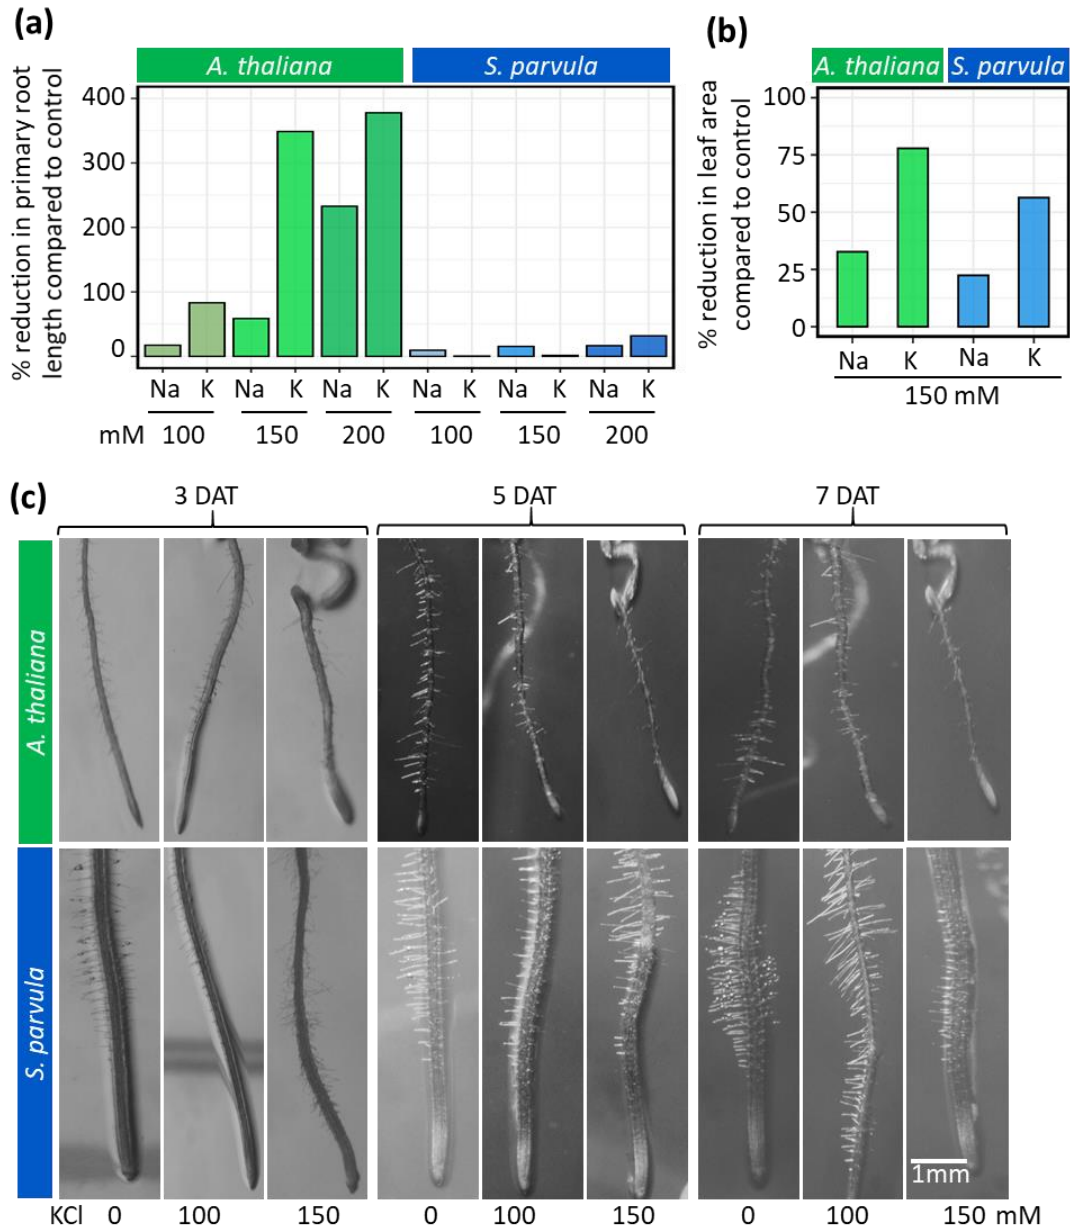

**Fig. S3** KCl is more toxic than NaCl at the same osmotic strength at the vegetative growth phases. Effects on (a) primary root length, (b) leaf area, and (c) root hair development upon high Na and K treatments compared to their respective controls. Primary root length was measured on 17-day-old seedlings grown on 1/4<sup>th</sup> MS media supplemented with 0 to 200 mM NaCl or KCl based on a 12-day treatment. Total leaf area per plant measured when plants developed the first floral bud following 1-2 weeks of salt treatments in a hydroponic medium. Minimum 5 plants per condition used in (a) and a minimum of 3 plants per condition used for (b). Same roots were photographed on 3, 5, and 7 DAT (Days after treatment).

1136  
1137

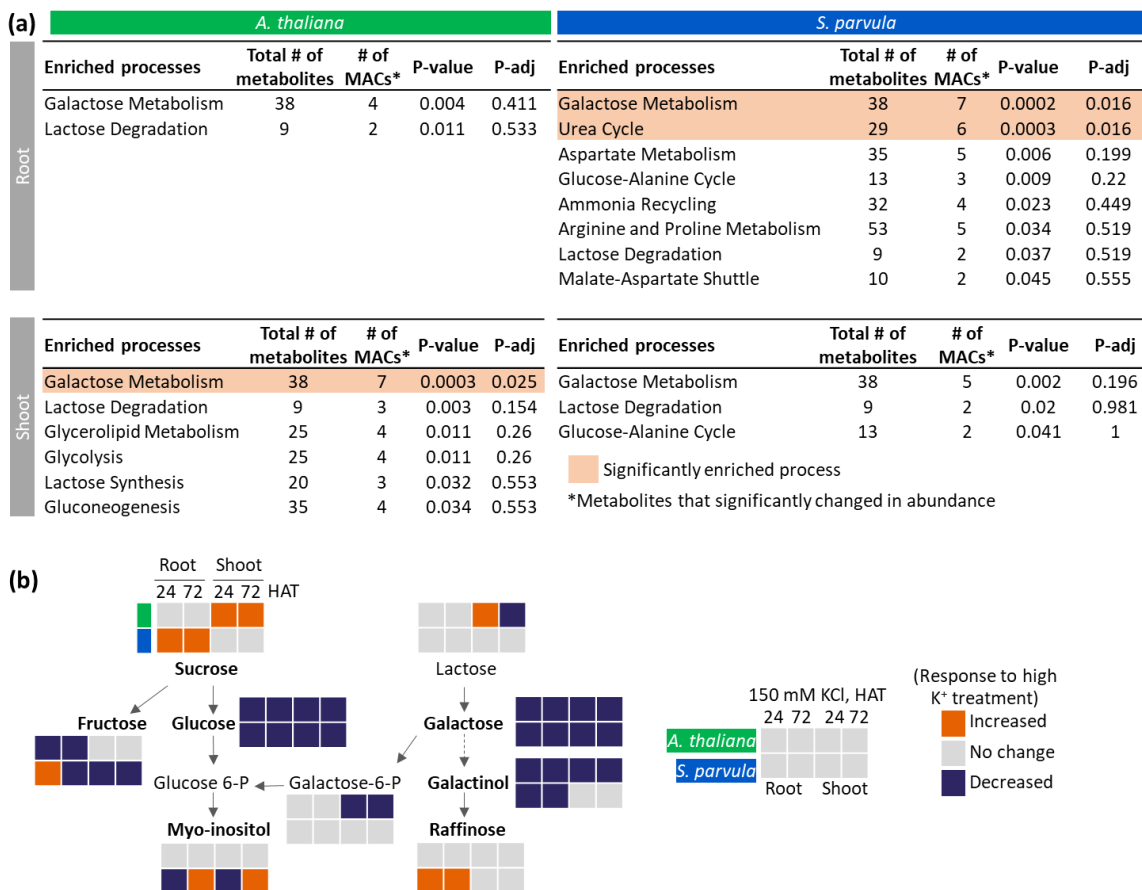

**Fig. S4** Carbohydrate and nitrogen metabolism related processes were enriched in *S. parvula* roots. (a) Enriched metabolic pathways in *A. thaliana* and *S. parvula* in response to excess K stress. Metabolite Enrichment Analysis was performed with MetaboAnalyst with a p-adj cut off set to  $\leq 0.05$ . p-values were adjusted using Benjamini-Hochberg correction for multiple testing. (b) Simplified galactose metabolism pathway (KEGG Pathway ID:ath00052). The seven metabolites that significantly changed in abundance and quantified using GC-MS are indicated in bold font.

1138  
 1139  
 1140  
 1141  
 1142  
 1143  
 1144  
 1145

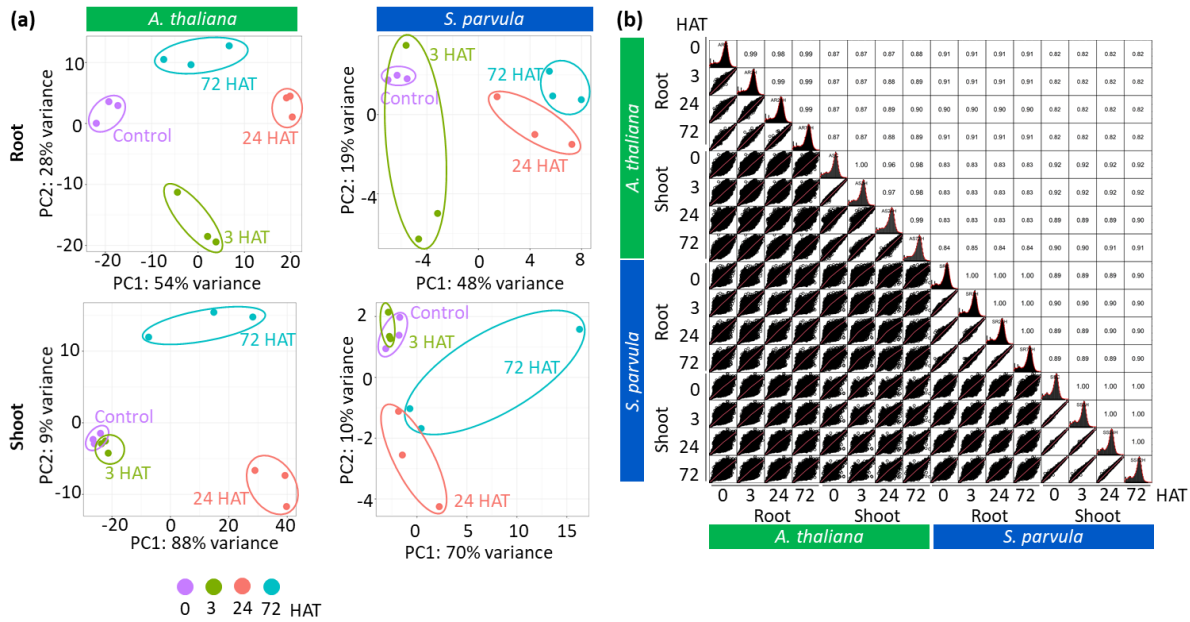

**Fig. S5** Overview of transcriptomes in each condition tested in response to high K stress in *A. thaliana* and *S. parvula* roots. (a) Principal component analysis (PCA) for 0, 3, 24, and 72 hours after treatment (HAT) for *A. thaliana* and *S. parvula* roots and shoots. (b) Overall transcript level correlation between conditions. Correlation plots were generated using PerformanceAnalytics library in R 4.0.2. Pearson correlation coefficient is given for each comparison.

1146

1147

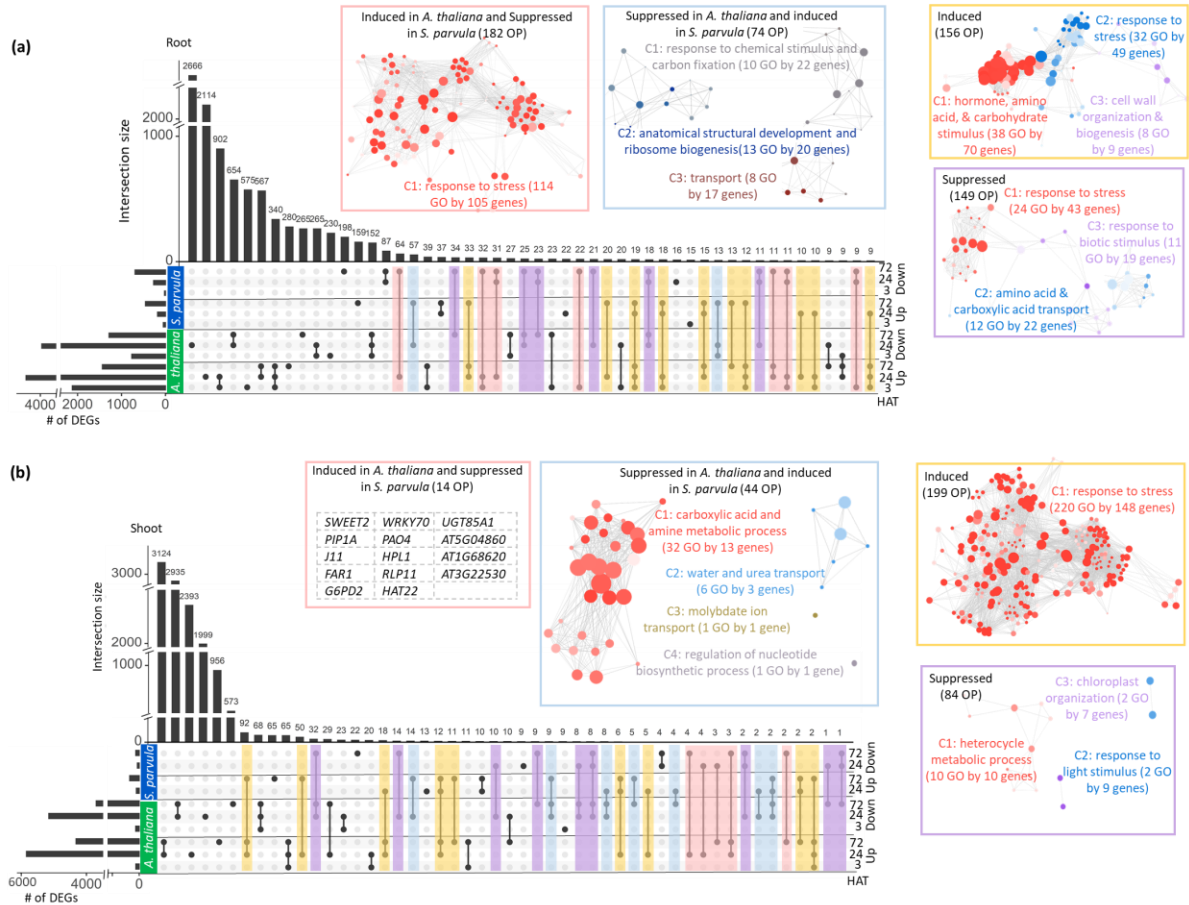

**Fig. S6** The majority of differentially expressed genes (DEGs) show species specific responses followed by tissue and response time specificity. Differentially expressed genes (DEGs) between *A. thaliana* and *S. parvula* for (a) roots and (b) shoots. Enriched functions are highlighted for diametric and shared responses between differently regulated ortholog pairs (OP). DEGs at each time point were called using DESeq2 compared to 0 h with a p-adj value based on Benjamini-Hochberg correction for multiple testing set to  $\leq 0.01$ . The shared genes were plotted using UpsetR in R 4.0.2.

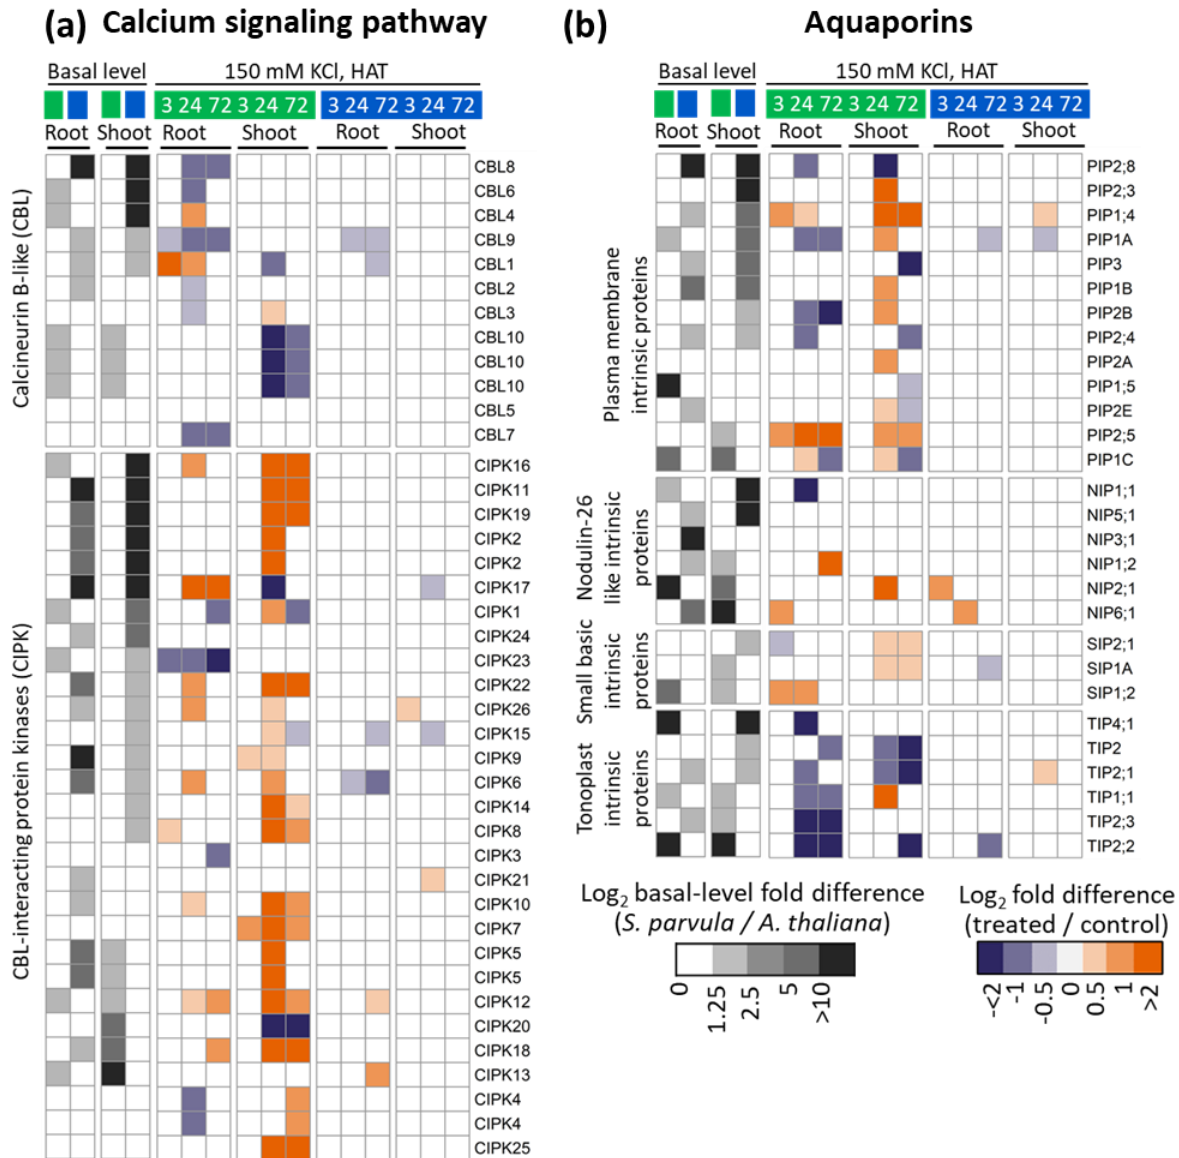

**Fig. S7** Genes coding for calcium signaling and aquaporins are differently regulated during high K<sup>+</sup> stress. Genes associated with (a) calcium signaling pathway and (b) aquaporins

1149  
 1150  
 1151  
 1152  
 1153  
 1154  
 1155  
 1156  
 1157

1158

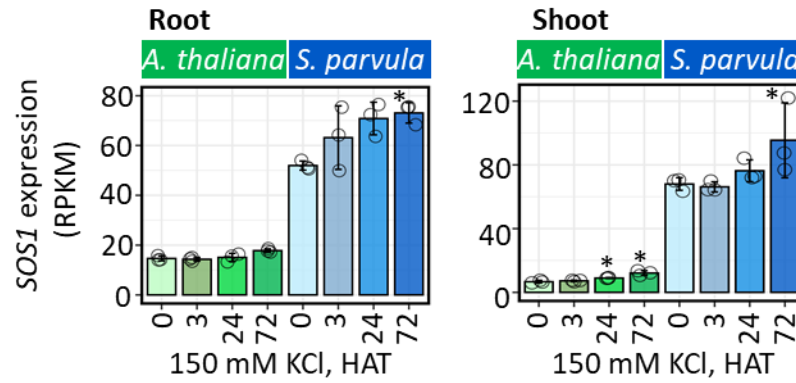

**Fig. S8** Normalized expression of *SOS1* in roots and shoots of *A. thaliana* and *S. parvula* under 150 mM KCl treatments. \* represent DEGs at each time point called using DESeq2 compared to 0 h with a p-adj value based on Benjamini-Hochberg correction for multiple testing set to  $\leq 0.01$ . Open circles indicate the measurement from each replicate.

1159
